1 PDK1 has a pleiotropic PINOID-independent role in Arabidopsis development

2

3 Yao Xiao<sup>1</sup>, Remko Offringa<sup>1\*</sup>

4

5 <sup>1</sup>Plant Developmental Genetics, Institute of Biology Leiden, Leiden University, Sylviusweg 72,  
6 2333 BE, Leiden, The Netherlands.

7 \*Author for correspondence: [r.offringa@biology.leidenuniv.nl](mailto:r.offringa@biology.leidenuniv.nl)

8 **Abstract**

9 The 3-Phosphoinositide-Dependent Protein Kinase 1 (PDK1) is a conserved and important  
10 master regulator of AGC kinases in eukaryotic organisms. *pdk1* loss-of-function causes a lethal  
11 phenotype in animals and yeast. In contrast, only very mild phenotypic defects have been  
12 reported for the *pdk1* loss-of-function mutant of the model plant *Arabidopsis thaliana*  
13 (*Arabidopsis*). The *Arabidopsis* genome contains two *PDK1* genes, hereafter called *PDK1* and  
14 *PDK2*. Here we show that the previously reported *Arabidopsis pdk1* T-DNA insertion alleles are  
15 not true loss-of-function mutants. By using CRISPR/Cas9 technology, we created true loss-of-  
16 function *pdk1* alleles, and *pdk1 pdk2* double mutants carrying these alleles showed multiple  
17 growth and development defect, including fused cotyledons, a short primary root, dwarf stature,  
18 late flowering, and reduced seed production caused by defects in male fertility. Surprisingly,  
19 *pdk1 pdk2* mutants did not phenocopy *pid* mutants, and together with the observations that  
20 *PDK1* overexpression does not phenocopy the effect of *PID* overexpression, and that *pdk1*  
21 *pdk2* loss-of-function does not change PID subcellular localization, we conclude that PDK1 is  
22 not essential for PID membrane localization or functionality *in planta*. Nonetheless, most *pdk1*  
23 *pdk2* phenotypes could be correlated with impaired auxin transport. *PDK1* is highly expressed  
24 in vascular tissues and YFP:PDK1 is relatively abundant at the basal/rootward side of root stele  
25 cells, where it colocalizes with PIN auxin efflux carriers, and the AGC1 kinases PAX and  
26 D6PK/D6PKLs. Our genetic and phenotypic analysis suggests that PDK1 is likely to control  
27 auxin transport as master regulator of these AGC1 kinases in *Arabidopsis*.

## 28 Introduction

29 Protein phosphorylation by protein kinases is a ubiquitous and crucial posttranslational  
30 modification in eukaryotic cells. It is involved in almost all cell activities, such as cell division,  
31 cell growth and environmental signaling. The AGC kinase family comprises some of the best-  
32 characterized protein serine/threonine kinases in eukaryotic cells, such as the founder  
33 members cyclic AMP-dependent protein kinase A (PKA) and calcium-dependent protein kinase  
34 C (PKC) (Pearce et al., 2010). These kinases play crucial roles in basal cellular functions in  
35 lower (yeast) and higher (human/mice) eukaryotes. For example, protein kinase B (PKB/c-Akt)  
36 is important in apoptosis inhibition and insulin signaling (Lawlor and Alessi, 2001), whereas p70  
37 ribosomal protein S6 kinase (S6K) plays an important role in mRNA translational control  
38 (Pearce et al., 2010; Bahrami-B et al., 2014). AGC kinases themselves are also  
39 phosphorylation substrates that can be activated by serine/threonine phosphorylation in the  
40 activation loop (T-loop) or in the C-terminal hydrophobic motif of the kinase domain (H-motif)  
41 (Chamoto et al., 2010). The 3-Phosphoinositide-Dependent Protein Kinase 1 (PDK1) is a well-  
42 established activator responsible for AGC kinase T-loop phosphorylation (Mora et al., 2004;  
43 Chamoto et al., 2010).

44 PDK1 itself is also a conserved member of AGC kinase family, and typically contains a kinase  
45 domain with a PDK1-Interacting Fragment (PIF)-binding pocket at its N-terminus and a PH  
46 domain at the C-terminus (Biondi et al., 2000; Frödin et al., 2002). Other AGC kinases have a  
47 C-terminal hydrophobic PIF motif, and the interaction with the PIF binding pocket in PDK1  
48 enhances their activation by phosphorylation. The PH domain is essential for PDK1 plasma  
49 membrane recruitment and kinase activity in mammals. Binding of the PH domain to the  
50 phospholipid phosphatidylinositol (3,4,5)-trisphosphate [PtdIns(3,4,5)P3] at the plasma  
51 membrane triggers PDK1 dimer to monomer conversion and phospho-activation (Alessi et al.,  
52 1997; Ziemba et al., 2013). PDK1 was originally named PtdIns(3,4,5)P3-dependent protein  
53 kinase 1 (Alessi et al., 1997), but the name was changed when PtdIns(3,4)P2, PtdIns3P and  
54 PtdIns(4,5)P2 also appeared to bind its PH domain (Currie et al., 1999; Deak et al., 1999).  
55 *Arabidopsis thaliana* PDK1 (AtPDK1) binds to an even broader selection of phospholipids *in*  
56 *vitro* (Deak et al., 1999). Nevertheless, the two most important phospholipids for mammalian

57 PDK1, PtdIns(3,4,5)P3 and PtdIns(3,4)P2, have not been identified in *Arabidopsis thaliana*  
58 (*Arabidopsis*) (Heilmann, 2016), and AtPDK1 activity has been reported to be controlled by  
59 PtdIns(4,5)P2 and phosphatidic acid (PA) (Anthony et al., 2004). *Arabidopsis* has two highly  
60 homologous *PDK1* genes, At5g04510 (*AtPDK1.1*) and At3g10540 (*AtPDK1.2*), and for  
61 convenience reasons we renamed them to respectively *PDK1* and *PDK2*.

62 Interestingly, the two yeast PDK1 orthologs Pkh1 and -2, which lack a PH domain, still have  
63 the ability to phosphorylate AGC kinases (Casamayor et al., 1999; Niederberger and  
64 Schweingruber, 1999; Voordeckers et al., 2011). *Physcomitrella patens* PDK1 (PpPDK1),  
65 which also lacks a PH domain, is able to rescue the lethal phenotype of the yeast *pkh1 pkh2*  
66 double mutant. This indicates that the PH domain is not required in all eukaryotes or full PDK1  
67 functionality (Dittrich and Devarenne, 2012a). Besides for yeast, complete loss-of-function of  
68 *PDK1* is also lethal for fruit flies and mice (Lawlor et al., 2002; Rintelen et al., 2002). In plants,  
69 several methods have been employed in different species to analyze PDK1 function *in planta*.  
70 Virus-induced gene silencing (VIGS) has been used to knock down tomato *PDK1*, whereas  
71 *Tos17* transposon mutagenesis or homologous recombination has been used in rice or  
72 *Physcomitrella patens*, respectively. However, in tomato the claimed cell death phenotype  
73 made *PDK1* knock-out expression unprovable (Devarenne et al., 2006), and in rice the *Tos17*  
74 insertion only led to a knock down of *PDK1* expression (Matsui et al., 2010; Dittrich and  
75 Devarenne, 2012a). Deletion of *PDK1* in *Physcomitrella patens* was not lethal, but *pdk1* knock-  
76 out mutants showed strong developmental defects (Dittrich and Devarenne, 2012a). In  
77 *Arabidopsis*, three combinations of *pdk1 pdk2* T-DNA insertion alleles have been reported to  
78 show altered sensitivity to *Piriformospora indica* induced growth promotion, and a weak  
79 developmental defect resulting in reduced silique length (Camehl et al., 2011; Scholz et al.,  
80 2019). Inhibition of *PDK1* expression in *Arabidopsis* cell suspensions using RNAi technology  
81 delivered no mutant cell phenotype (Anthony et al., 2004).

82 In contrast to the lack of a clear *in planta* role for PDK1, all *Arabidopsis* AGC kinases  
83 phosphorylated by PDK1 *in vitro*, including PINOID (PID), Oxidative Signal-Inducible1(OXI1),  
84 UNICORN (UCN) and most AGC1 family members, do play key roles in plant development and  
85 defense (Anthony et al., 2004, 2006; Zegzouti et al., 2006a, 2006b; Devarenne et al., 2006;  
86 Camehl et al., 2011; Enugutti et al., 2012; Gray et al., 2013; Scholz et al., 2019). PID

87 phosphorylates PIN auxin efflux carriers to control their polarity and thereby direct the auxin flux  
88 (Christensen et al., 2000; Benjamins et al., 2001; Friml et al., 2004; Kleine-Vehn et al., 2009;  
89 Dhonukshe et al., 2010; Huang et al., 2010). OXI1 plays a dual role in regulating both root hair  
90 growth and the basal immune response against virulent pathogen infection (Anthony et al.,  
91 2004; Rentel et al., 2004; Anthony et al., 2006; Petersen et al., 2009; Matsui et al., 2010;  
92 Camehl et al., 2011). UCN was recently shown to be a phosphorylation target of PDK1 *in vitro*,  
93 but genetic evidence suggests that UCN negatively regulates PDK1 at the post-transcriptional  
94 level to control planar growth (Scholz et al., 2019). The other established PDK1 targets all  
95 belong to the AGC1 protein kinases family (Galván-Ampudia and Offringa, 2007; Rademacher  
96 and Offringa, 2012), which has been well-characterized during the past decade. The D6 protein  
97 kinases (D6PKs, including D6PK/AGC1.1, D6PKL1/AGC1.2, D6PKL2/PK5, D6PKL3/PK7),  
98 PROTEIN KINASE ASSOCIATED WITH BRX (PAX/AGC1.3), PAX LIKE (PAXL/AGC1.4) and  
99 AGC1-12 all have been shown to phosphorylate PIN proteins to enhance auxin transport  
100 activity (Zourelidou et al., 2009; Willige et al., 2013; Barbosa et al., 2014, 2018; Haga et al.,  
101 2018; Marhava et al., 2018). The tomato ortholog of PAX, also known as AvrPto-dependent  
102 Pto-interacting protein 3 (Adi3), negatively controls plant cell death caused by pathogen attack  
103 (Devarenne et al., 2006; Gray et al., 2013). AGC1.5 and AGC1.7 control polar growth of pollen  
104 tubes by phosphorylating RopGEFs. (Zhang et al., 2009; Li et al., 2018), and ROOT HAIR  
105 SPECIFIC 3 (RSH3/AGC1.6) specifically regulates root hair morphology (Won et al., 2009).  
106 The disproportion between the *in vivo* data on the functions of the different Arabidopsis AGC  
107 kinases that are established *in vitro* phosphorylation targets of AtPDK1, and the small role that  
108 AtPDK1 itself seems to play in development based on the *pdk1 pdk2* double mutant phenotype,  
109 made us reinvestigate the published data on *AtPDK1*.  
110 PID has been reported as one of the prime targets of PDK1 (Zegzouti et al., 2006a), but the  
111 *pdk1 pdk2* double mutant lacks the typical *pid* loss-of-function phenotypes. We therefore  
112 generated Arabidopsis lines overexpressing *PDK1* (*PDK1ox*), and found that seedlings of these  
113 lines lacked the strong phenotypes observed in seedlings overexpressing *PID* (*PIDox*). These  
114 results suggest that either PDK1 requires activation and that this is not triggered in the *PDK1ox*  
115 seedlings, or that it is not rate limiting for PID activity. Next, we re-analyzed the published *pdk1*  
116 and *pdk2* T-DNA insertion alleles. Based on RT-PCR experiments, the two *pdk2* alleles

117 appeared to represent true loss-of-function mutants. However, functional *PDK1* mRNA was still  
118 detectable in the three *pdk1* alleles, explaining the lack of strong phenotypes in the *pdk1 pdk2*  
119 double mutant combinations. Using CRISPR/Cas9, we generated several true *pdk1* loss-of-  
120 function mutant alleles, which when combined with the *pdk2* T-DNA insertion allele did display  
121 strong growth and developmental defects. The mutant phenotypes indicate a pleiotropic, but  
122 PID-independent role for PDK1 in plant development as regulator of auxin transport.

## 123 **Results**

### 124 ***PDK1ox* and *PIDox* seedlings do not share phenotypes.**

125 The key defects caused by *PIDox* in Arabidopsis are agravitropic seedling growth and collapse  
126 of the main root meristems as a result of redirected polarity of PIN-mediated auxin transport  
127 (Figure 1G, H, J) (Benjamins et al., 2001; Friml et al., 2004). In view of the model that *PDK1*  
128 regulates *PID* kinase activity (Zegzouti et al., 2006a), we expected *PDK1ox* to cause similar  
129 phenotypes as *PIDox*. More than thirty independent *p35S::YFP:PDK1* or *p35S::PDK1*  
130 transgenic lines were selected and T2 seedlings grown on vertical agar plates showed normal  
131 gravitropic growth. Five single locus homozygous T3 lines with different *PDK1* overexpression  
132 levels were subsequently selected for further phenotype observation and quantification (Figure  
133 1I). All of the representative *PDK1ox* lines showed normal gravitropic seedling growth and no  
134 collapse of the main root meristem was observed (Figure 1). Roots of *p35S::YFP:PDK1#5.4*  
135 and *p35S::YFP:PDK1#9.6* seedlings were even slightly longer than wild-type roots (Figure 1H),  
136 however, this phenotype did not clearly correlate with the *PDK1* overexpression level (Figure  
137 1I). Also mature *PDK1ox* plants developed and flowered like wild-type Arabidopsis plants.  
138 The above results suggest that PDK1 is not rate limiting for endogenous PID activity. However,  
139 we cannot exclude that the PDK1 kinase itself requires signaling to be activated, and that  
140 therefore its overexpression does not lead to additional phenotypes under normal growth  
141 conditions.

142

### 143 **CRISPR/Cas9-generated mutant alleles indicate a central role for PDK1 in development**

144 To obtain further indications for the proposed role of PDK1 as upstream regulator of PID, we  
145 re-assessed the previously described *pdk* loss-of-function mutant alleles. Three *pdk1* and two  
146 *pdk2* T-DNA insertion alleles have been reported to be loss-of-function mutants (Camehl et al.,  
147 2011; Scholz et al., 2019). Neither *pdk1* nor *pdk2* single mutants showed any noticeable  
148 phenotype, and different double mutant combinations of the *pdk1* and *pdk2* alleles only showed  
149 a mild reduction in silique length and plant height (Camehl et al., 2011; Scholz et al., 2019).

150 Two *pdk2* alleles, *pdk2-1* and *pdk2-4*, were confirmed to be true knock-out mutants by RT-PCR  
151 analysis (Figure 2A, B). However, in contrast to published data, the *pdk1-c* allele appeared to  
152 produce a full length mRNA (Figure 2A, B) (Camehl et al., 2011; Scholz et al., 2019), whereas  
153 the *pdk1-a* and *pdk1-b* alleles produced a partial or mutated mRNA (Figure 2A, B, Figure S1),  
154 leading to the production of a PDK1 kinase lacking its PH domain (Figure S1). Previous studies  
155 have suggested that a PH domain may not be essential for PDK1 function in plants (Dittrich  
156 and Devarenne, 2012b). When we tested the kinase activity of PDK1 lacking a PH domain *in*  
157 *vitro*, it showed very high autophosphorylation activity (Figure 2C). Based on these findings, we  
158 concluded that the three published *pdk1* T-DNA insertion alleles are not likely to be true loss-  
159 of-function mutants.

160 In order to obtain true *pdk1* alleles for studying PDK1 biological function, we designed guide  
161 RNAs against the 3<sup>rd</sup> and 7<sup>th</sup> exon, and were able to obtain five CRISPR/Cas9-generated  
162 mutants with frame shifts in the *PDK1* open-reading frame (Figure 2D, E). Like the *pdk1* T-DNA  
163 insertion alleles, these new *pdk1* mutant alleles did not result in significant morphological  
164 differences from wild type. However, when combined with the *pdk2-1* or *pdk2-4* alleles, all  
165 double mutant combinations showed the same striking dwarf phenotype (Figure 2F-J).  
166 Complementation analysis using either *p35S::PDK1*, *p35S::YFP:PDK1* or *pPDK1::YFP:PDK1*  
167 showed that the dwarf phenotype was caused by *pdk* loss-of-function (Figure 2J, Figure S2).  
168 For all three constructs, several lines were obtained that showed complete rescue of the *pdk1-*  
169 *13 pdk2-4* double mutant phenotype (Figure S2, Figure S3A). The results show that *PDK1* and  
170 *PDK2* act redundantly and have a much more important role in plant growth and development  
171 than was previously reported.

172

### 173 ***pdk* loss-of-function leads to many developmental defects, but not to a *pid* phenocopy.**

174 Besides the decreased rosette diameter and reduced final plant height (Figure 2G, H), *pdk1*  
175 *pdk2* double mutant plants flowered much later and showed strong reproductive defects (Figure  
176 2I, J; Figure 3). The number of double homozygous F2 progeny obtained was much lower (1 in  
177  $47.7 \pm 2.6$ ) than the Mendelian ratio (1 in 16). Also F2 plants with the *pdk1(-/-) pdk2(+/-)* or

178 *pdk1(+/-) pdk2(-/-)* genotype produced homozygous progeny at a much lower frequency than  
179 the expected 1 in 4 ratio (

180 Table S1). Seed production of the homozygous *pdk1 pdk2* mutants ( $1.5 \pm 0.21$  per silique for  
181 *pdk1-13 pdk2-4*) was significantly reduced compared to wild type ( $65.9 \pm 0.61$  per silique).  
182 Mutant plants developed very short siliques (Figure 3A), a phenotype that has previously been  
183 reported for Arabidopsis plants that are both male and female sterile (Huang et al., 2016). These  
184 results implied that *pdk1 pdk2* loss-of-function causes gametophyte and/or embryo  
185 development defects in Arabidopsis. Reciprocal crosses between wild-type and *pdk1-13 pdk2-*  
186 *4* double mutant plants revealed both male-related and female-related reduced fertility.  
187 However, since the cross Col-0<sup>♀</sup> x *pdk1-13 pdk2-4*<sup>♂</sup> produced fewer seeds than the  
188 reciprocal cross *pdk1-13 pdk2-4*<sup>♀</sup> x Col-0<sup>♂</sup> (Figure S4A), it is likely that male gametophyte  
189 development is more strongly impaired by *pdk* loss-of-function than female gametophyte  
190 development. Alexander staining showed that pollen grain development in the *pdk1 pdk2*  
191 double mutant was not aborted, but that anther dehiscence was the major cause of the male  
192 fertility problems (Figure 3B-E, I). In addition, *in vitro* germination of *pdk1 pdk2* pollen resulted  
193 in strangely shaped pollen tubes as a result of aberrant tip growth (Figure 3F, G). After 18-hour  
194 incubation on pollen germination medium, *pdk1-13 pdk2-4* pollen tube growth arrested with a  
195 bulb-like structure, and as a result they remained much shorter than wild type pollen tubes  
196 (Figure 3G, H). The ovules of double mutant plants did not show noticeable morphological  
197 alterations (Figure S4B,C), which is in line with the predominant effect of *pdk* loss-of-function  
198 on male fertility .

199 In contrast to the fertility problems, *pdk1 pdk2* double mutants developed relatively normal  
200 flowers that showed no clear patterning defects. Flowers did show early stigma exposure due  
201 to impaired sepal growth, and slightly reduced filament elongation (Figure 3I). The short  
202 inflorescences seemed not the result of reduced internode elongation, but were most likely  
203 caused by early inflorescence meristem arrest (Hensel et al., 1994) (Figure 2J). The lack of  
204 phenotypic resemblance between *pdk1-13 pdk2-4* and *pid-14* inflorescences and flowers  
205 (Figure 2J) suggests that PDK1 is not essential for full PID function during inflorescence  
206 development. Moreover, expression of a PID:YFP fusion in *pdk1-13 pdk2-4* protoplasts showed  
207 that PDK1 activity is not necessary for the predominant localization of PID at the plasma



208 membrane (Figure 2K). Based on these results and the overexpression data we conclude that,  
209 in contrast to what has previously been suggested (Zegzouti et al., 2006a, 2006b), PDK1 is not  
210 a key regulator of PID activity.

211

## 212 **Alternative splicing produces a functional cytosolic PDK1 isoform lacking a PH domain**

213 The *PDK2* gene produces a single transcript, whereas transcription of *PDK1* results in at least  
214 six different mature transcripts, due to alternative splicing events at the 5<sup>th</sup>, 7<sup>th</sup> and 9<sup>th</sup> intron  
215 (<https://www.araport.org/>). These transcripts can be translated into five different protein  
216 isoforms, which we named respectively PDK1S0, PDK1S1, PDK1S2 and PDK1S3 (Figure 4A).  
217 We checked the abundance of each mature transcript using semi-quantitative RT-PCR followed  
218 by restriction digestion. The full-length *PDK1* transcript was most abundant, and the short *PDK1*  
219 transcripts producing isoforms lacking part of the kinase domain (PDK1S1, PDK1S2, and  
220 PDK1S3) were also present at high levels, while the transcript producing the PDK1S0 isoform  
221 with a complete kinase domain, was the least abundant (Figure 4B).

222 In order to test the functionality of the different isoforms, we expressed the corresponding  
223 cDNAs in yeast (*S. cerevisiae*) strain INA106-3B, in which the *PKH2* gene copy has been  
224 replaced by *LEU2*, and the *PKH1* gene copy has been mutated so that strain INA106-3B is able  
225 to grow normally at 25°C but not at 35°C. As expected based on previous experiments,  
226 expression of the full length *PDK1* or *PDK2* cDNAs allowed this strain to grow at 35°C (Dittrich  
227 and Devarenne, 2012a) (Figure 4C). In contrast, expression of the cDNAs producing the  
228 PDK1S1, PDK1S2 or PDK1S3 isoforms did not allow growth at the restrictive temperature,  
229 suggesting that any deletion of the conserved kinase domain renders PDK1 non-functional  
230 (Figure 4C). This is in line with loss-of-function observed for the new *Arabidopsis* alleles *pdk1-*  
231 *11*, *-13*, *-14*, *-31* and *-32*, which all express partial PDK1 proteins having a small or bigger  
232 deletion of the C-terminal part of the kinase domain (Figure 2D, E, F). Interestingly, expression  
233 of the PDK1S0 did permit INA106-3B to grow at 35°C (Figure 4C). The yeast data were  
234 confirmed by 35S promoter-driven expression in the *Arabidopsis pdk1 pdk2* loss-of-function  
235 mutant background. *p35S::PDK1* provided full rescue of the vegetative growth phenotypes of

236 the Arabidopsis *pdk1 pdk2* mutant, and some *p35S::PDK1S0* lines showed the same level of  
237 rescue (Figure S3A). In contrast, expression of PDK1S1 and PDK1S2 did not result in any  
238 rescue (Figure S3A). Expression of a *YFP:PDK1S0* fusion under control of the *PDK1* promoter  
239 in the *pdk1-14 pdk2-4* mutant background also completely rescued the mutant vegetative  
240 growth phenotypes (Figure 4D). However, *pPDK1::YFP:PDK1S0 pdk1-13 pdk2-4* plants  
241 developed shorter siliques carrying fewer seeds compared to wild-type or *pPDK1::YFP:PDK1*  
242 *pdk1-14 pdk2-4* plants (Figure 4E). Interestingly, a similar silique phenotype has also been  
243 described for the Arabidopsis *pdk1-b pdk2-1* double mutant, and according to our own analysis  
244 the T-DNA insertion in the *pdk1-b* allele leads to the production of a shorter PDK1 protein with  
245 an intact kinase domain but lacking the PH domain (Camehl et al., 2011) (Figure 2A, B).  
246 These results corroborate the conclusions from the complementation experiments in yeast that  
247 a full-length kinase domain is essential for PDK1 function, but that surprisingly the PH domain  
248 is not essential for PDK1 function during Arabidopsis vegetative growth. Since the PH domain  
249 is responsible for lipid binding, we checked the *PDK1* promoter driven YFP:PDK1 and  
250 YFP:PDK1S0 localization in root columella cells, where *PDK1* is highly expressed. YFP:PDK1  
251 localized both on the plasma membrane and in the cytoplasm, whereas YFP:PDK1S0 was only  
252 found in the cytoplasm (Figure S3B, C). The functional relevance of the latter low abundant  
253 cytosolic isoform remains unclear. Our findings do suggest, however, that PH domain-  
254 dependent plasma membrane association of PDK1 is only essential during specific  
255 developmental processes.

256

### 257 ***PDK1* and *PDK2* are broadly expressed during development.**

258 Since the *pdk1 pdk2* mutant shows many defects in development and growth, we analysed the  
259 spatio-temporal expression pattern of the two *PDK* genes to uncover their tissue-specific  
260 functions. For this purpose we generated Arabidopsis (Col-0) lines carrying the  
261 *pPDK1::turboGFP:GUS* (*pPDK1-GG*) or *pPDK2::turboGFP:GUS* (*pPDK2-GG*) construct and  
262 used a *pdk1-14 pdk2-4* mutant line carrying the complementing *pPDK1::YFP:PDK1* construct.  
263 *PDK1* appeared to be strongly expressed in (pro)vascular tissues from the early globular

264 embryo stage on, and in the columella root cap (Figure 5, Figure S5). The gene also showed  
265 more general expression in young hypocotyls, cotyledons, leaves and floral organs, and in  
266 growing siliques. The expression pattern of *PDK2* was very comparable to that of *PDK1* (Figure  
267 5 D, E, H, K, L), except that no expression was observed in the root apex (Figure 5D) or in  
268 embryos (data not shown).

269 As previously observed for PDK2:EGFP (Scholz et al., 2019), YFP:PDK1 did not localize in the  
270 nucleus, but was mainly found in the cytoplasm or associated with the plasma membrane  
271 (Figure 5 C, F; Figure S3B;). In (pro)vascular cells in heart stage embryos and roots, YFP:PDK1  
272 showed predominant basal (rootward) localization (Figure 5 C, F; Figure S5), just like PIN1 and  
273 the PDK1 targets PAX and D6PK (Gälweiler et al., 1998; Zourelidou et al., 2009; Marhava et  
274 al., 2018).

275

#### 276 **Auxin transport is impaired in *pdk1-13 pdk2-4* mutant.**

277 Even though the *PDK1* overexpression and loss-of-function phenotypes did not point to an  
278 important role for PDK1 in PID function, the *pdk1-13 pdk2-4* mutant seedling phenotypes did  
279 suggest involvement of PDK1 in the regulation of auxin response or -transport (Figure 6A-E).  
280 Mutant primary roots elongated normally up to two days after germination, but after that their  
281 growth rate declined (Figure 6 A,B), and roots started to oscillate randomly with a large  
282 amplitude, resulting in curved short roots (Figure S6). Of 199 7-day-old seedlings, 18.1% of the  
283 primary roots grew into the air. On a total of 460 *pdk1-13 pdk2-4* mutant seedlings, 58% showed  
284 fused or single dark green cotyledons, and the remaining 42% developed two cotyledons with  
285 short petioles positioned at an abnormal angle ( $< 180^\circ$ ) (Figure 6C-E). The cotyledon  
286 phenotypes and short agravitropic roots are usually observed in auxin response or -transport  
287 mutants or transport inhibitor-treated seedlings. By combining the *pdk1-13 pdk2-4* double  
288 mutant with the or *pDR5::GUS* auxin response reporter, we observed that auxin response was  
289 absent or strongly decreased in the root stele and confined to the root tip, while an enhanced  
290 auxin response was observed at the mutant cotyledon edges and in the fragmented cotyledon  
291 veins (Figure 6F, G, I, K). This highly resembled the *DR5::GUS* expression of 7-day-old

292 seedlings grown on medium supplemented with the auxin transport inhibitor naphthylphthalamic  
293 acid (NPA) (Figure 6H, J) (Sabatini et al., 1999; Bao et al., 2004). Moreover, the increase in  
294 *DR5::GUS* expression in cotyledons corroborated that *pdk1-13 pdk2-4* mutants are defective  
295 in auxin transport, rather than in auxin biosynthesis or -signaling. Short time treatment of wild-  
296 type and *pdk1-13 pdk2-4* seedlings with IAA and subsequent qPCR analysis showed that the  
297 auxin inducible expression of the *IAA5*, *GH3.3* and *SAUR16* genes was not impaired,  
298 confirming that the mutants are not defective in auxin response (Figure 6L). Instead, *pdk1-13*  
299 *pdk2-4* mutant seedlings were hypersensitive to NPA treatment compared to wild type (Figure  
300 6M). Moreover, the auxin transport capability of *pdk1-13 pdk2-4* inflorescence stems was  
301 significantly reduced compared to that of wild-type stems (Figure 6N). Together, the above data  
302 point toward a role for PDK1 in enhancing polar auxin transport.

303

#### 304 **PDK1 regulates PIN-mediated auxin efflux probably through the AGC1 kinases .**

305 Several *in vitro* PDK1 phosphorylation substrates are AGC kinases that have been reported to  
306 regulate auxin transport by direct phosphorylation of PIN auxin efflux carriers (Zegzouti et al.,  
307 2006b; Willige et al., 2013; Marhava et al., 2018; Haga et al., 2018). The fact that their loss-of-  
308 function mutants share phenotypic defects with the *pdk1-13 pdk2-4* mutant, such as the short  
309 root of the *pax* mutant (Marhava et al., 2018), or the fused cotyledons of the *d6pk012* triple  
310 mutant (Zourelidou et al., 2009), hinted that these AGC kinases might indeed be regulated by  
311 PDK1 *in planta*. The stronger *pdk1-13 pdk2-4* mutant phenotype suggested that PDK1 has  
312 many more phosphorylation substrates.

313 In order to investigate whether PIN proteins themselves are PDK1 phosphorylation substrates,  
314 we deduced based on published *in vitro* phosphorylation data, that PDK1 prefers to  
315 phosphorylate the second serine residue in the RSXSSFVG motif (X represents any amino acids)  
316 that is part of the activation segment of the AGC kinases (Zegzouti et al., 2006a, 2006b).  
317 Analysis of the large central hydrophilic loop (HL) of the 5 Arabidopsis PIN1-type PIN proteins  
318 identified several RXXS motifs. However, *in vitro* phosphorylation assays using GST-tagged  
319 PDK1 (GST-PDK1) and GST-tagged versions of the HL of PIN1, PIN2, PIN3 or PIN7 (GST-

320 PIN1/2/3/7HL) only showed phosphorylation of the PIN2HL (Figure 7A). Interestingly, PIN2HL  
321 S1,2,3A, in which the PID phosphorylation sites are substituted by alanines, was also  
322 phosphorylated by PDK1 at same level as the wild-type PIN2HL (Figure 7A). PDK1 must  
323 therefore phosphorylate one or more other serine residues that are unique to the PIN2HL.  
324 However, PIN2 is not co-expressed with PDK1, and the PIN proteins that are co-expressed with  
325 PDK1 in the root stele or columella cells (PIN1, PIN3 and PIN7) are not phosphorylated by  
326 PDK1 *in vitro*. Moreover, no noticeable alteration in PIN1/3/7 protein polarity was observed in  
327 *pdk1-13 pdk2-4* mutant roots (Figure 7C-J). The PIN2:GFP abundance was slightly decreased  
328 in *pdk1-13 pdk2-4* mutant root tips (Figure 7I, J, L), but this might be an indirect effect of *pdk*  
329 loss-of-function on auxin distribution in the root tip, as we measured a slight increase in GFP  
330 intensity in *DR5::GFP pdk1-13 pdk2-4* mutant versus wild-type root tips (Figure 7B, K). Our  
331 results suggest that PDK1 regulates auxin transport, most likely by activating one or more AGC  
332 kinases, such as PAX and D6PK, which subsequently regulate auxin efflux activity by direct  
333 phosphorylation of the PINs.

334

## 335 **Discussion**

336 PDK1 is a well-established key regulator of AGC kinases in animals and yeast, and its  
337 importance in these organisms is demonstrated by the lethality caused by loss-of-function  
338 mutations in the genes encoding for this protein kinase (Casamayor et al., 1999; Rintelen et al.,  
339 2002; Lawlor et al., 2002; Mora et al., 2004). Also in the model plant *Arabidopsis*, PDK1 has  
340 been shown to phosphorylate several AGC kinases *in vitro* (Zegzouti et al., 2006a, 2006b),  
341 However, the previously reported impact of loss-of-function of the two gene copies *PDK1* and  
342 *PDK2* on *Arabidopsis* development was only limited (Camehl et al., 2011; Scholz et al., 2019).  
343 In this study, we found that the published T-DNA insertion alleles of the *Arabidopsis PDK1* gene  
344 copy are not loss-of-function mutants. Here we generated several CRISPR/Cas9-based true  
345 loss-of-function *pdk1* alleles that, when combined with the available *pdk2* loss-of-function  
346 mutant alleles, did lead to strong developmental defects. Different from animals and yeast  
347 though, and more similar to the situation in *Physcomitrella Patens*, *Arabidopsis pdk1 pdk2* loss-  
348 of-function mutants are viable, indicating that the substrate preference of plant PDK1 has  
349 changed from that in other eukaryotes, and that it has lost its involvement in signaling pathways  
350 that are essential for cell survival.

351

## 352 **PDK1 is not essential for PID activity controlling inflorescence and cotyledon** 353 **development**

354 By carefully recording the *pdk1 pdk2* mutant phenotypes, we analysed the genetic relation  
355 between PDK1 and its reported *in vitro* substrates, of which PID was the key candidate  
356 (Zegzouti et al., 2006a). Loss-of-function of both *PDK* genes leads to fused cotyledons, short  
357 wavy roots, dwarf stature and reduced fertility resulting in short siliques. To our surprise, *pdk1*  
358 *pdk2* does not share the three cotyledon, pin inflorescence and aberrant flower phenotypes that  
359 are typical for *pid* loss-of-function mutants, implying that PDK1 is not essential for PID function  
360 in these tissues. PID is an auto-activating kinase *in vitro* and might act independent of upstream  
361 activating kinases (Christensen et al., 2000; Benjamins et al., 2001), or other kinases than  
362 PDK1 might be involved in hyper-activating PID during embryo, inflorescence and flower

363 development. The latter seems most likely based on the observation that flower, leaf and shoot  
364 extracts can hyperactivate PID *in vitro* (Zegzouti et al., 2006a). A physical interaction between  
365 PID and PDK1 through the PIF domain, as suggested by Zegzouti et al. (Zegzouti et al., 2006a),  
366 has never been proven, and was purely based on *in vitro* phosphorylation data. Here we show  
367 unequivocally that PID does not require PDK1 for its association with the PM, which  
368 corroborates the finding that this is mediated by an arginine-rich loop in the kinase domain of  
369 PID (Simon et al., 2016). All data are in line with the observation that a PID:GUS fusion lacking  
370 the PIF domain can still complement *pid* loss-of-function mutants (Benjamins et al., 2001).  
371 Although we cannot fully exclude that PDK1 and PID do have a functional interaction, our  
372 results at least indicate that this interaction is not essential for the majority of the PID activities  
373 in plant development.

374

#### 375 **Is PDK1 a master regulator of AGC kinases in Arabidopsis?**

376 If not PID, which and how many other Arabidopsis AGC kinases are potential phosphorylation  
377 substrates of PDK1? The developmental defects of the *pdk1 pdk2* double mutant together with  
378 the altered *pDR5* expression pattern and reduction in auxin transport all point toward a role for  
379 PDK1 in promoting polar auxin transport. Interestingly, several *pdk1 pdk2* mutant phenotypes  
380 are also observed for loss-of-function mutants of members of the AGC1 kinase sub-family, for  
381 some of which a role as regulator of polar auxin transport is now well established (Zourelidou  
382 et al., 2009; Willige et al., 2013; Barbosa et al., 2014; Haga et al., 2018; Marhava et al., 2018).  
383 For example, the fused cotyledons, deficient lateral root emergence and agravitropic primary  
384 root growth closely resemble phenotypes observed for the *d6pk012* triple mutant (Zourelidou  
385 et al., 2009). And a short primary root is also observed for the *pax* mutant (Marhava et al., 2018),  
386 and like *pdk1 pdk2*, the *agc1.5 agc1.7* double mutant is defective in pollen tube growth (Zhang  
387 et al., 2009). Since the corresponding AGC1 kinases are strongly dependent on PDK1 for their  
388 *in vitro* activation (Zegzouti et al., 2006b), it seems possible that PDK1 might act as a master  
389 regulator of these AGC1 kinases. Further experimentation is required, however, for each of  
390 these kinases to prove this hypothesis.

391 Recently, a genetic interaction with *PDK1* was reported for a kinase of the AGC2 clade,  
392 UNICORN (UCN, AGC2-3), in controlling integument growth (Scholz et al., 2019). According to  
393 Scholz and coworkers, UCN acts as repressor of PDK1 function. The absence of UCN activity  
394 or PDK1 overexpression leads to uncontrolled integument and petal growth, and the *pdk1-c*  
395 *pdk2* T-DNA insertion mutant combination can rescue the *ucn* loss-of-function mutant defects.  
396 Like Scholtz et al., we did not observe defects in ovule development for the new *pdk1 pdk2*  
397 allelic combinations (Figure S4B, C). It will be interesting to see if our new *pdk1-13 pdk2-4*  
398 double mutant combination will also lead to restoration of the *ucn-1* flower and ovule  
399 phenotypes.

400

#### 401 **Alternative splicing provides possible functional differentiation for PDK1.**

402 By studying *pdk1* T-DNA insertion alleles and splice variants produced by the *PDK1* gene, we  
403 revealed that the PH domain is not essential for the general PDK1 function in Arabidopsis. The  
404 alternative splicing product PDK1S0, which lacks phospholipid binding ability and membrane  
405 localization but still has kinase activity, is able to rescue the thermosensitive growth of the yeast  
406 *pkh1 pkh2* double mutant strain INA106-3B, and most of the developmental defects of the  
407 Arabidopsis *pdk1 pdk2* loss-of-function mutant. A similar PDK1 protein variant appeared to be  
408 produced in the Arabidopsis *pdk1-a* and *pdk1-b* T-DNA insertion alleles, which were initially  
409 thought to be complete loss-of-function alleles. This explains the relatively mild flower  
410 phenotypes observed for the Arabidopsis *pdk1-a pdk2* and *pdk1-b pdk2* double mutants  
411 (Camehl et al., 2011; Scholz et al., 2019). The reduced growth response of these mutants  
412 induced by phosphatidic acid downstream of *Piriformospora indica* infection (Camehl et al.,  
413 2011) suggests a differential function for PDK1S0 and PDK1 in development and stress  
414 response, respectively. This is in line with the observation that phosphatidic acid, an important  
415 second messengers for stress response, can directly bind and stimulate the activity of full length  
416 Arabidopsis PDK1 (Deak et al., 1999; Anthony et al., 2004). In animals, phospholipids are  
417 known to bind to PDK1 to induce PDK1 dimer to monomer conversion and activation (Alessi et  
418 al., 1997; Ziemba et al., 2013). The functionality of PDK1S0 in most developmental processes



419 questions the importance of the clear basal polarity of full length PDK1 in (pro) vascular cells  
420 in the embryo and root tip. Apparently, PDK1 binding to the AGC kinase PIF domain is  
421 sufficiently efficient, and does not require prior co-localisation at the PM. In conclusion,  
422 alternative splicing of *PDK1* transcripts may provide a novel and unique regulation mechanism  
423 for balancing growth and defense in Arabidopsis, which differs from animals and yeast.

## 424 **Materials and methods**

### 425 **Plant lines and growth condition**

426 *Arabidopsis thaliana* (L.) ecotype Columbia 0 (Col-0) was used as wild-type control for all  
427 experiments, since all mutant and transgenic lines are in the Col-0 background. Previously  
428 described T-DNA insertion lines SALK\_053385 (*pdk1.1-1*, renamed to *pdk1-c*), SALK\_11325C  
429 (*pdk1.1a*, renamed to *pdk1-a*), SALK\_007800 (*pdk1.1b*, renamed to *pdk1-b*), SAIL\_62\_G04  
430 (*pdk1.2-2*, renamed to *pdk2-4*) and SAIL\_450\_B01 (*pdk1.2-3*, renamed to *pdk2-1*) were  
431 ordered from the Nottingham Arabidopsis Stock Centre (Camehl et al., 2011; Scholz et al.,  
432 2019). The following Arabidopsis lines are also described elsewhere: *pDR5::GFP*  
433 (Ottenschlager et al., 2003), *pDR5::GUS* (Benjamins et al., 2001), *pPIN1::PIN1:GFP* (Benkova  
434 et al., 2003), *pPIN2::PIN2:GFP* (Xu and Scheres, 2005), *pPIN3::PIN3:GFP* (Zádníková et al.,  
435 2010), *pPIN7::PIN7:GFP* (Blilou et al., 2005) and *p35S::PID#21* (Benjamins et al., 2001). For  
436 lines created in this study, the T-DNA constructs *p35S::YFP:PDK1*, *p35S::PDK1*,  
437 *pPDK1/2::turboGFP:GUS*, and *pYAO-Cas9-gRNA1/2/3* were transformed into Col-0 using  
438 *Agrobacterium*-mediated floral dip transformation (Clough and Bent, 1998). Homozygous lines  
439 with a single T-DNA insertion were selected for further analysis. Of the 80 CRISPR/Cas9  
440 transgenic alleles obtained, 7 appeared to contain loss-of-function mutations in the 3<sup>rd</sup> and  
441 7<sup>th</sup> exon of *PDK1*. The CRISPR/Cas9 T-DNA construct in the new *pdk1* mutant alleles was  
442 segregated out during the generation of the *pdk1 pdk2* double mutant. Five mutant alleles with  
443 open reading frame shifts were used for further analysis (Figure 2C).

444 For complementation analysis of PDK1 isoforms, the T-DNA constructs *p35S::YFP:PDK1* or  
445 *p35S::PDK1FL/S1/S2* were transformed into the *pdk1-13(+/-) pdk2-4(-/-)* mutant background,  
446 *p35S::YFP:PDKS0* or *p35S::PDK1S0* were transformed into the *pdk1-13(-/-) pdk2-1(+/-)*  
447 mutant background, or *pPDK1::YFP:PDK1FL and S0* were transformed into the *pdk1-14(-/-)*  
448 *pdk2-4(+/-)* or *pdk1-13(+/-) pdk2-4(-/-)* mutant background, respectively. The genotype of the  
449 *pdk1 pdk2* mutant background was confirmed by PCR before floral dip transformation. All  
450 genotyping primers are summarized in Table S2.

451 Plants were grown on soil at 21 °C, 16 hr photoperiod, and 70% relative humidity. For seedling

452 growth, seeds were surface-sterilized by 1 minute in 70% ethanol, 10 minutes in 1% chlorine  
453 followed by five washes with sterile water. Sterilized seeds were kept in the dark at 4 °C for 2  
454 days for vernalization and germinated on vertical plates with 0.5× Murashige and Skoog (1/2  
455 MS) medium (Duchefa) containing 0.05% MES, 0.8% agar and 1% sucrose at 22 °C and 16 hr  
456 photoperiod.

457

#### 458 **RNA extraction and (q)RT-PCR**

459 Total RNA was extracted from 5-day-old seedlings using a NucleoSpin RNA Plant kit (Macherey  
460 Nagel, #740949). Reverse transcription (RT) was performed using a RevertAid Reverse  
461 Transcription Kit (Thermo Scientific™, #K1691). For qRT-PCR on auxin induced genes, RNA  
462 was isolated from 5-day-old Col-0 and *pdk1-13 pdk2-4* seedlings treated for 1 hour with 10 μM  
463 IAA. Gene expression was normalized to the reference gene *PP2A-3 (AT2G42500)* using the  
464  $\Delta\Delta C_t$  method. For analysis of the *pdk1* and *pdk2* T-DNA alleles, RT-PCR was performed with  
465 DreamTaq DNA Polymerases (Thermo Scientific™). (q)RT-PCR primers are listed in Table S2.  
466 For detection of the *PDK1* splice variants, RT-PCR was performed for 40 cycles using the  
467 forward (FP) and reverse (FL, S0, S1, and S2) primers (Figure 5B), as listed in Table S2. PCR  
468 reactions with primer pair FP and (FL)R were digested with *BstZ17I*, *NsiI* and *SspI* to detect  
469 PDK1FL, with primer pair FP and (S0)R with *BstZ17I* and *NsiI* to detect PDK1S0, and with  
470 primer pair FP and (S1)R with *BstZ17I* to detect PDK1S1. 0.1 μL of the enzymes *BstZ17I*, *NsiI*  
471 and/or *SspI* (Thermo Scientific™) was directly added to the 20 μL PCR reaction and reactions  
472 were incubated at 37°C overnight before gel electrophoresis. Detection of PDK1S2 and  
473 PDK1S3 with primer pair FP and (S2)R did not require restriction enzymes digestion. qRT-PCR  
474 was performed in the CFX96 Touch™ Real-Time PCR Detection System (Bio-Rad) using TB  
475 Green Premix Ex Taq II (Tli RNase H Plus) (Takara, #RR820B).

476

#### 477 **Cloning procedures**

478 To generate the *Promoter::turboGFP:GUS* fusions, a *SacI-TurboGFP-Pacl* fragment was

479 cloned from *pICSL80005* into *pMDC163*, resulting in *pMDC163(gateway)-TurboGFP:GUS* .  
480 *PDK1* and *PDK2* promoter regions of approximately 2.0 kb including the first six codons were  
481 amplified from Col-0 genomic DNA using the primers listed in Table S2, and cloned in  
482 *pDONR207* by LR recombination. The resulting fragments were subsequently fused in-frame  
483 with the *turboGFP:gusA* reporter gene in *pMDC163(gateway)-TurboGFP:GUS* by BP  
484 recombination. (Invitrogen, Gateway BP/LR Clonase II Enzyme Mix, #11789020 and  
485 #12538120).

486 *PDK1* splice variants were amplified from cDNA of 5-day-old seedlings using the respect  
487 primers (Table S2), after which restriction enzymes described in the RT-PCR section were  
488 employed. Fragments were cloned in *pDONR207* by BP recombination, and subsequently  
489 transferred to *pART7-35S::YFP:gateway* by LR recombination, resulting in *pART7-*  
490 *35S::YFP:PDK1FL/S0/S1/S2*. Expression cassettes were excised with *NotI* and cloned into  
491 *NotI* digested *pART27*, resulting in *pART27-35S::YFP:PDK1FL/S0*. The same entry vectors  
492 and LR recombination were used to generate *pMDC32-35S::PDK1FL/S0/S1/S2* and *pGEX-*  
493 *PDK1FL/S0*. *pGEX-PIN1HL*, *pGEX-PIN2HL* and *p35S:PID:YFP* have been described  
494 previously (Galván-Ampudia and Offringa, 2007; Huang et al., 2010; Dhonukshe et al., 2010).  
495 *PIN3HL* and *PIN7HL* were amplified from Col-0 cDNA using primers listed in Table S2 and  
496 cloned into *pGEX* also using Gateway cloning technology to obtain *pGEX-PIN3HL* and *pGEX-*  
497 *PIN7HL*.

498 To generate *pPDK1::YFP:PDK1FL/S0* fusions, the 2.0Kb *PDK1* promoter region was  
499 introduced into *pART27-35S::YFP:PDK1S0* by replacing the 35S sequence using restriction  
500 enzymes *BstXI* and *KpnI*. *pART27-pPDK1::YFP:PDK1S0* and *pDONR207* were mixed with BP  
501 clonase to obtain *pART27-pPDK1::YFP:gateway*. *PDK1FL* was then recombined into *pART27-*  
502 *pPDK1::YFP:gateway* by LR reaction to obtain *pART27- pPDK1::YFP:PDK1FL*.

503 To obtain the *p416GPD-PDK* constructs for expression in yeast, *BamHI-PDK1FL/S0/S1/S2-*  
504 *EcoRI* and *BamHI-PDK2-XhoI* fragments were amplified from *pDONR207-PDK1FL/S0/S1/S2*  
505 and 5-day-old seedling cDNA, respectively, using primers listed in Table S2. Fragments were  
506 digested with the appropriate restriction enzymes and ligated into vector *p416GPD*.

507 The *pCambia-pYAO-Cas9-gRNA1/2/3* plasmids for CRISPR/Cas9 mediated mutagenesis were  
508 obtained by ligating the *EcoRI*-(Cas9+terminator)-*AvrII* fragment from *pDE-Cas9* (Fauser et al.,

509 2014) into *pCambia1300* digested with *EcoRI* and *XbaI*. The *EcoRI* and *SaII* sites in the  
510 resulting *pCambia-Cas9* plasmid were used to clone the *EcoRI*-YAO promoter-*EcoRI* (Yan et  
511 al., 2015) and *XhoI*-gateway-*XhoI* fragments amplified from respectively *Arabidopsis* Col-0  
512 genomic DNA and the *pART7-35S::YFP:gateway* plasmid. Regions producing guide RNAs  
513 (Table S2) designed to target respectively the 3<sup>rd</sup>, 6<sup>th</sup> or 7<sup>th</sup> exon of *PDK1* were ligated into pEn-  
514 Chimera (Fauser et al., 2014), and introduced behind the YAO promoter in pCambia-pYAO-  
515 Cas9-gateway by LR recombination.

516 All primers used for cloning are summarized in Table S2.

517

### 518 **General phenotypic analysis and physiological experiments**

519 NPA treated (stock in DMSO, 1/10<sup>4</sup> dilution) or normally grown seedlings, potted plants, siliques  
520 and inflorescences were photographed with a Nikon D5300 camera at the indicated time. For  
521 imaging of inflorescences, the top part of the inflorescence was cut from 15 cm high plants. For  
522 Figure 6A, seedlings were transferred to and aligned on a black plate before imaging. Primary  
523 root length, rosette diameter and silique length were measured with ImageJ (Fiji). Plant height  
524 was measured directly using a ruler. Root tips, opened siliques, flowers, details of floral organs  
525 and cotyledons were imaged using a Leica MZ16FA stereomicroscope equipped with a Leica  
526 DFC420C camera. All measurements based on photos were performed in ImageJ and  
527 analyzed and plotted into graphs in GraphPad Prism 5.

528

### 529 **Phenotypic analysis of reproductive organs**

530 To examine pollen vitality, anthers were collected from flowers just before opening into 70µL  
531 Alexander staining buffer [10% ethanol, 0.01% (w/v) Malachite green, 25% glycerol, 5% (w/v)  
532 phenol, 5% (w/v) chloral hydrate, 0.05% (w/v) fuchsin acid, 0.005% (w/v) OrangeG and 1.5%  
533 glacial acetic acid ] on a microscopy slide, covered with cover slip, and incubated at 55 °C for  
534 1 hr before imaging. For pollen tube growth, pollen of just opened flowers were transferred  
535 to a dialysis membrane placed on solid pollen germination medium [18% Sucrose, 0.01% Boric

536 acid, 1 mM CaCl<sub>2</sub>, 1 mM Ca (NO<sub>3</sub>)<sub>2</sub>, 1 mM MgSO<sub>4</sub> and 0.5% agarose] and incubated at 22 °C  
537 for 18 hrs. Ovules were cleared in chloral hydrate solution (chloral hydrate: glycerol: water =  
538 4:2:1 by weight) for 4 hrs. Stained or germinated pollen and cleared ovules were imaged using  
539 a Zeiss Axioplan 2 microscope with DIC optics and Zeiss AxioCam MRc 5 digital color camera.  
540 Pollen tube length was measured with ImageJ (Fiji).

541

#### 542 **Protoplast isolation and transformation**

543 Protoplasts were isolated and transformed as previously described, but with some  
544 modifications to the protocol (Schirawski et al., 2000). Protoplasts were isolated from 4-week-  
545 old rosette leaves instead of from cell suspensions, and we used a 40% PEG4000 solution and  
546 15 µg *pART7-35S::PID:YFP* for each transformation.

547

#### 548 **Auxin transport measurements**

549 Auxin transport assays were carried out as previously reported, with some modifications  
550 (Zourelidou et al., 2009). Four 2.5 cm inflorescence stem segments from the basal part of 15cm  
551 inflorescence stems were placed in inverted orientation into 30 µL auxin transport buffer (0.5  
552 nM IAA, 1% sucrose, 5 mM MES, pH 5.5) with or without 50 µM NPA for 1 hour, then transferred  
553 to 30 µL auxin transport buffer with or without 50 µM NPA containing 200 nM radiolabeled  
554 [<sup>3</sup>H]IAA (Scopus Research BV, Veenendaal, The Netherlands), allowed to incubate for 30  
555 minutes and subsequently transferred to 30 µL auxin transport buffer without radiolabeled  
556 [<sup>3</sup>H]IAA and incubated for another 4 hrs. Segments were cut into 5 mm pieces, the bottom piece  
557 (0-0.5 cm) was discarded and the remaining pieces were placed separately into 5 mL Ultima  
558 Gold™ (PerkinElmer, # 6013329) for overnight maceration. The [<sup>3</sup>H]IAA was quantified using a  
559 PerkinElmer Tri-Carb 2810TR low activity liquid scintillation analyzer.

560

561 **GUS staining and microscopy**

562 Fresh seedlings and plant organs were directly soaked into GUS staining buffer [10 mM EDTA,  
563 50 mM sodium phosphate (pH 7.0), 0.1% (v/v) Triton X-100, 0.5 mM  $K_3Fe(CN)_6$ , 0.5 mM  
564  $K_4Fe(CN)_6$ , 1 mg/ml 5-bromo-4-chloro-3-indolyl-D-glucuronide] under vacuum for 15 min  
565 and incubated at 37 °C for 18 hrs. Subsequently, samples were cleared in 70% (v/v)  
566 ethanol at room temperature before imaging with Leica MZ16FA or Leica MZ12 equipped  
567 with Leica DFC420C or DC500 camera respectively.

568 To visualize YFP:PDK1 in embryos and roots or PID:YFP in protoplasts, a Zeiss LSM5  
569 Exciter/Axiolmager equipped with a 514 nm laser and a 530-560 nm band pass filter was  
570 used on. GFP signals in roots of 5-day-old seedlings were visualized by optionally staining with  
571 10 µg/mL propidium iodide (PI) for 5 min on slides, and observing the samples with a Zeiss  
572 LSM5 Exciter/Axiolmager equipped with a 488 nm laser and a 505–530 nm band pass filter to  
573 detect GFP fluorescence, or a 650 nm long pass filter to detect PI fluorescence. All images  
574 were captured with a 40× oil immersion objective (NA = 1.2). Images were optimized in Adobe  
575 Photoshop cc2018 and assembled into figures using Adobe Illustrator cc2017. DR5::GFP total  
576 intensity was measured from three-dimensional reconstruction of the root tips with ImageJ (Fiji).  
577 Apical PIN2:GFP abundance was also measured with ImageJ (Fiji) by drawing a free-hand line  
578 along the center of the apical PM of epidermal cells.

579

580 ***in vitro* phosphorylation and yeast complementation**

581 *In vitro* phosphorylation and yeast complementation experiments were performed as previously  
582 described (Huang et al., 2010; Dittrich and Devarenne, 2012a)

583

584

585 **Acknowledgments**

586 We thank Christian Hardtke and Claus Schwechheimer for providing *pax paxl* and *d6pk012*  
587 mutant seeds, respectively. We thank Timothy Devarenne for providing yeast strain *p416GPD*,  
588 Sylvia de Pater for providing the CRISPR/Cas9 plasmids, Xiao Men for sharing preliminary data  
589 on PIN2HL phosphorylation by PDK1, Kees Boot for help with the auxin transport assay, and  
590 Gerda Lamers and Joost Willemsse for help with microscopy. We are grateful to Nick Surtel,  
591 Ward de Winter and Jan Vink for their help with plant growth and media preparation. This project  
592 was supported by the China Scholarship Council.



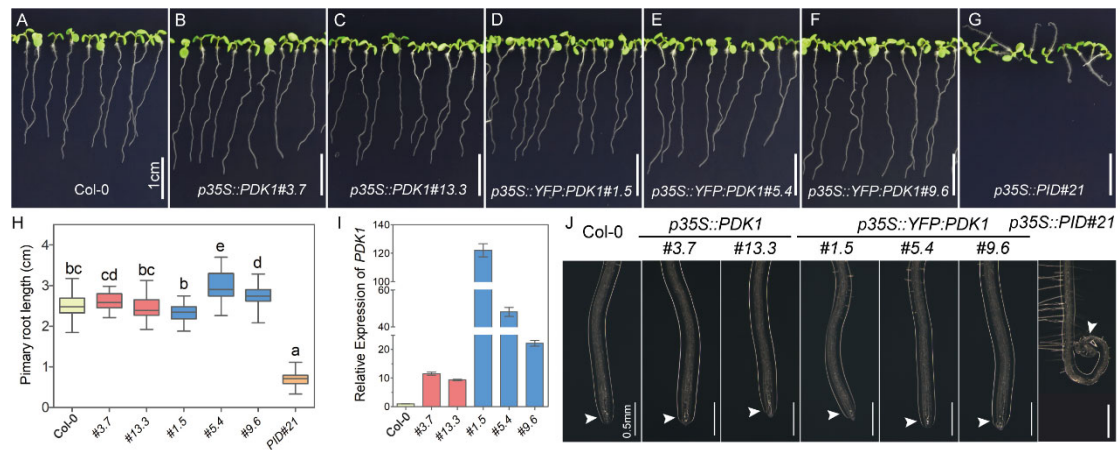

593

594 Figure 1, Seedling and root phenotype of *PDK1* and *PID* overexpression lines. A-G, Representative  
 595 7-day-old seedlings for indicated lines. Please note that only *p35S::PID#21* seedlings show  
 596 agravitropic growth. Scale bars represent 1cm. H, Box plot with Min/Max whiskers showing the  
 597 quantification of the primary root length of 7-day-old seedlings of Arabidopsis wild type (Col-0),  
 598 *p35S::PDK1* lines #3.7 and 13.3 (red box), *p35S::YFP:PDK1* lines #1.5, 5.4 and 9.6 (blue box), and  
 599 *p35S::PID* line #21 The results are from a single experiment (n>36 per line), but similar results were  
 600 obtained in 3 experimental repeats. Lower case letters indicate statistically different groups ( $p < 0.05$ ),  
 601 as determined by a one-way ANOVA followed by Tukey's test. I, *PDK1* expression levels in Col-0 and  
 602 in the *p35S::PDK1* and *p35S::YFP:PDK1* lines used in H. The bar graph shows the mean value  $\pm$  SEM.  
 603 J, Representative images showing a detail of the root tip phenotype of seedlings in A-H. White arrow  
 604 heads point out collapsed (*p35S::PID#21*) or normal root meristems (all other lines). Scale bar  
 605 indicates 0.5 mm.

606

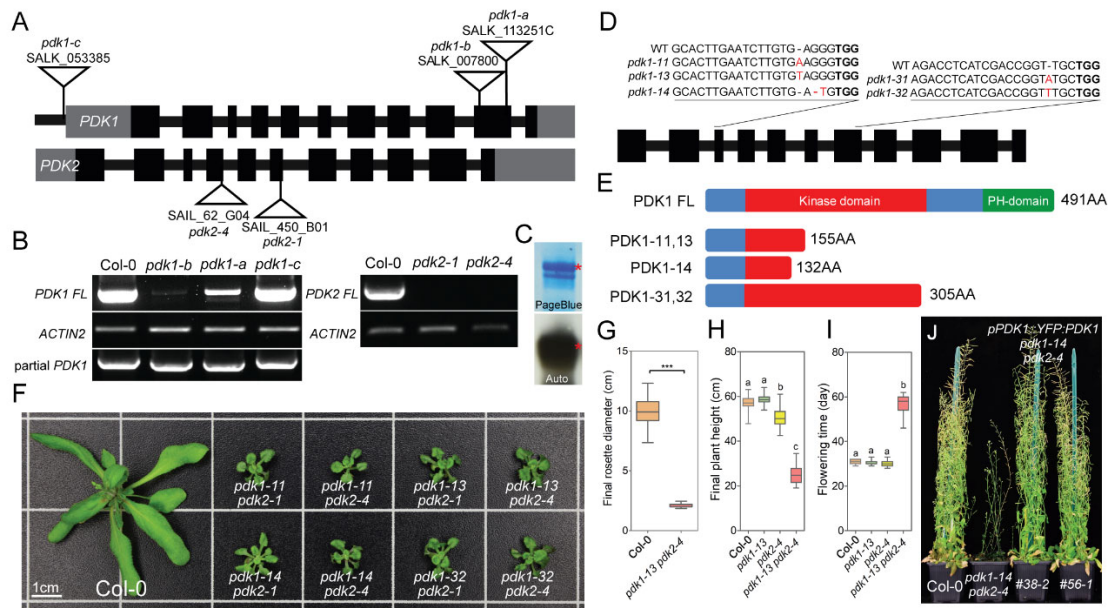

607

608

609

610

611

612

613

614

615

616

617

618

619

620

621

622

623

624

625

626

627

Figure 2, Arabidopsis double mutants that combine the new CRISPR/Cas9-generated *pdk1* loss-of-function alleles with one of the *pdk2* loss-of-function T-DNA alleles exhibit a dwarf stature. A, Schematic representation of the *PDK1* and *PDK2* gene structure, with the T-DNA insertion positions and names of the available mutant alleles indicated. Wide black boxes represent exons, gray boxes represent 5' and 3' untranslated regions (UTRs), and narrow black boxes represent introns and promoter sequence upstream of *PDK1* 5' UTR. B, Semiquantitative RT-PCR to detect *PDK1* or *PDK2* expression in the different *pdk1* or *pdk2* T-DNA insertion mutant alleles, respectively. C, Autophosphorylation activity of GST-PDK1S0 (lacking PH domain, similar size as partial PDK1 in *pdk1-b*). The GST-PDK1S0 band is marked with a red asterisk. D, Schematic representation of part of the *PDK1* gene with the guide RNA target sites and the resulting mutations in the newly obtained CRISPR/Cas9-generated alleles. The PAM sequence for Cas9 is highlighted in bold. Inserted or replaced nucleotides in the new mutant alleles are highlighted in red. Mutant alleles obtained at editing site1 (3<sup>rd</sup> exon) and site3 (7<sup>th</sup> exon) are named *pdk1-1n* and *pdk1-3n*, respectively. Since *pdk1-12* and *pdk1-13* have same "T" insertion, only *pdk1-13* is shown. E, Schematic linear representation of the full length (FL, 491 amino acids) PDK1 protein (protein kinase domain: amino acids 44 to 311, PH domain: amino acids 386 to 491, <https://www.uniprot.org>), and the shorter versions produced in the *pdk1-11*, *-13*, *-14*, *-31* and *-32* alleles. F, Rosette phenotype of 30-day-old wild-type Arabidopsis (Col-0) and eight different *pdk1 pdk2* loss-of-function allele combinations. G, Quantification of the rosette diameter of the 30-day-old Arabidopsis wild-type (Col-0, n=30) and *pdk1-13 pdk2-4* (n=19) plants shown in F. Asterisks indicate significant differences (*t*-test, P<0.0001).

628 H, Final plant height of the indicated lines (n>14). I, Flowering time of the indicated lines (n>14).  
629 Letters a, b, and c in H and I indicate statistical differences, as determined by one-way ANOVA  
630 followed by Tukey's test ( $p < 0.05$ ). J, Introduction of *PDK1::YFP:PDK1* in the *pdk1-14 pdk2-4*  
631 background completely rescues the mutant phenotype.

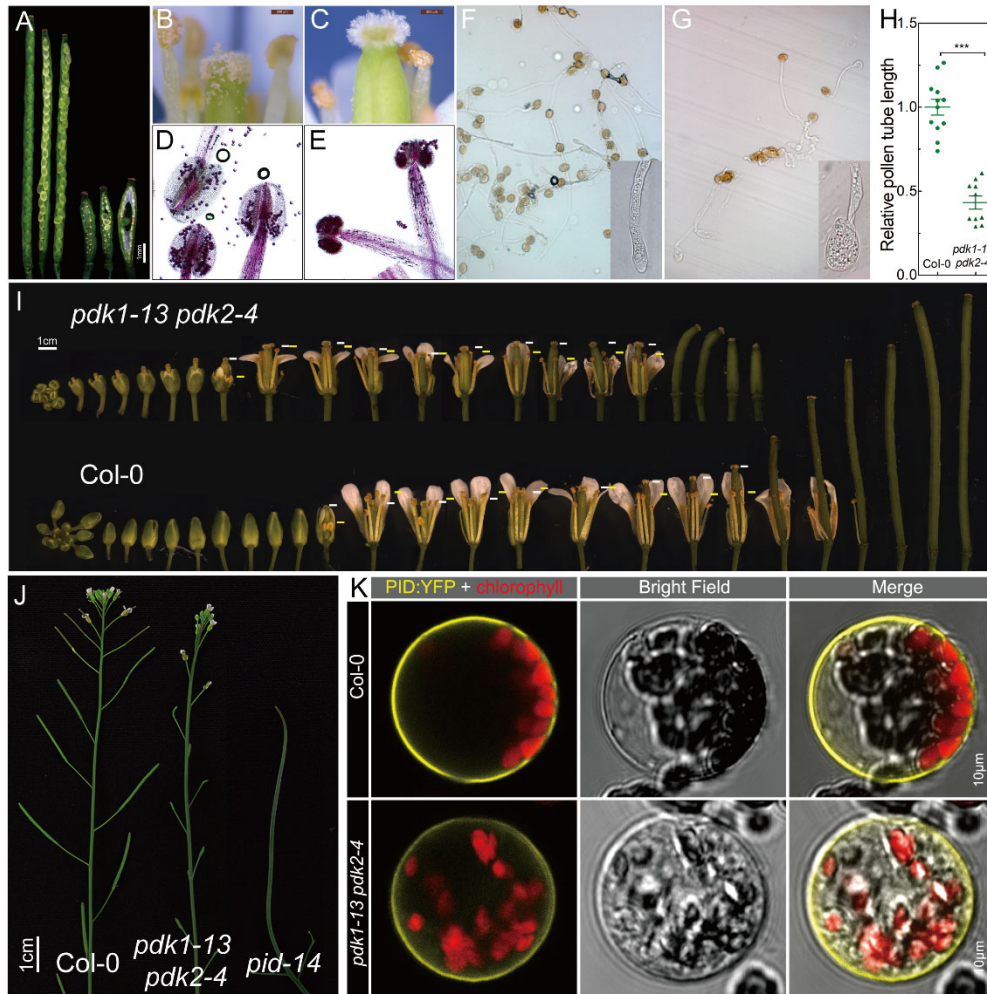

632

633 Figure 3, Flowering *pdk1 pdk2* mutant plants show clear developmental defects, but do not

634 phenocopy *pid* mutant plants. A, *pdk1 pdk2* siliques (three on the right) are much shorter than wild-

635 type siliques (three on the left), and contain many unfertilized ovules. B and C, Difference in pollen

636 grain deposition on the stigma of a wild-type (B) or a *pdk1-13 pdk2-4* mutant (C) flower. D and E,

637 Mature wild-type (D) or *pdk1-13 pdk2-4* mutant (E) anthers stained with Alexander's showing that

638 pollen grains are viable, but that mutant anthers do not sufficiently dehisce. F and G, *In vitro*

639 germination of wild-type (F) and *pdk1-13 pdk2-4* mutant (G) pollen. A detail of pollen tube tip is

640 shown in the inset. H, Relative pollen tube length after 18 hours incubation. The average length of

641 wild-type (Col-0) pollen tubes is put at 1.0. Asterisks indicate a significant difference (Student's *t*-test,

642  $p < 0.001$ ). I, Developmental series of *pdk1-13 pdk2-4* mutant and wild-type (Col-0) flowers. The

643 white bars indicates the position of the gynoecium apex, the yellow bars indicate the position of the

644 anthers. J, Inflorescence phenotype of wild type (Col-0), *pdk1-3 pdk2-4* and *pid-14*. K,

645 Representative images of PID:YFP subcellular localization in Col-0 or *pdk1-13 pdk2-4* protoplasts.

646 More than ten observed protoplasts for each line showed the same localization.

647

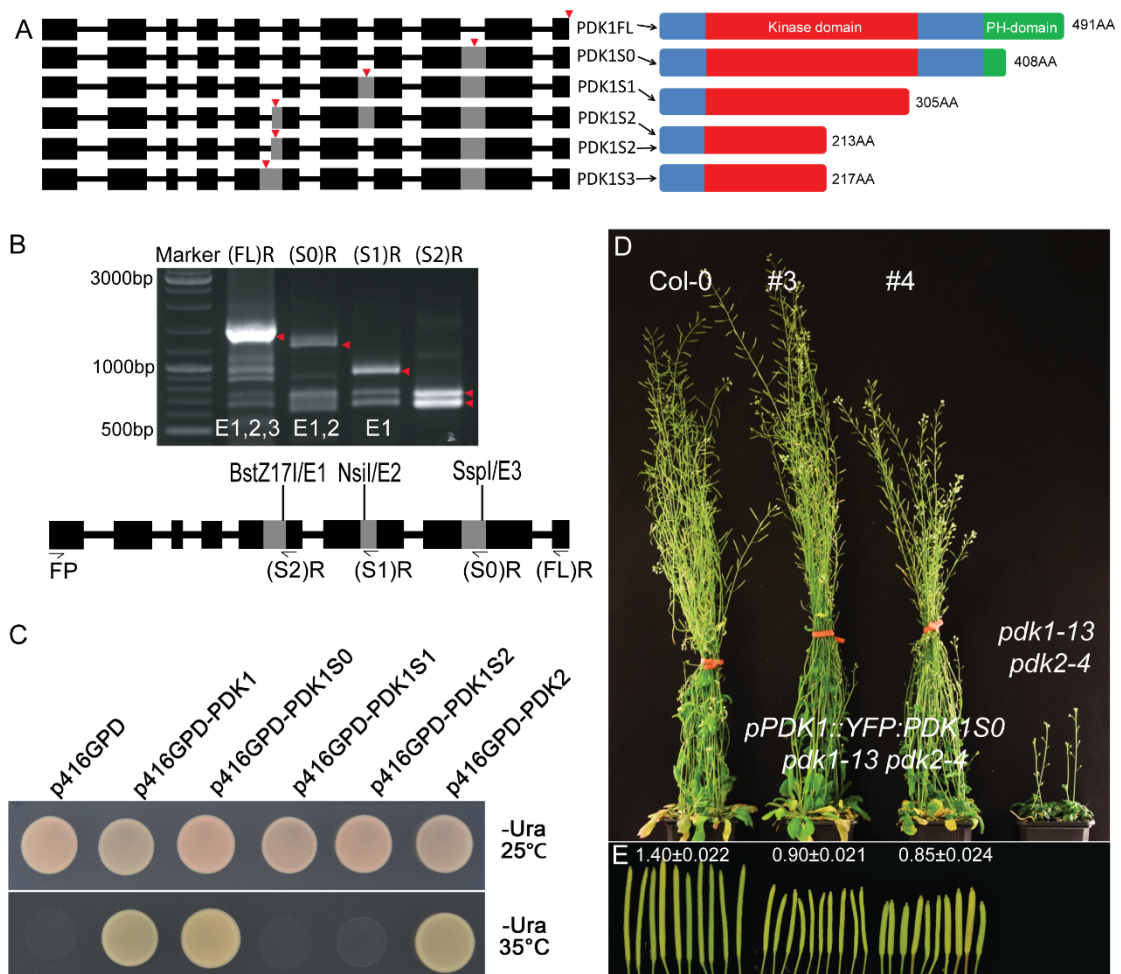

648

649 Figure 4, Alternative splicing produces a *PDK1* transcript encoding a functional PDK1 lacking  
 650 the PH domain. A, Schematic representation of the *PDK1* gene indicating the alternative splice events  
 651 (left) and the respective protein isoforms produced by the splice variants (right). On the left: wide  
 652 black boxes represent exons, gray boxes represent unspliced introns, black lines represent spliced  
 653 introns, red arrows point out the locations of stop codons. Please note that PDK1S1 is lacking six  
 654 amino acids of the kinase domain. B, Expression level of the different splice variants, as detected by  
 655 RT-PCR. Primer binding and restriction enzyme recognition site locations are shown in the schematic  
 656 representation below (see detailed description in the materials and methods section). Red  
 657 arrowheads point out the *PDK1FL*, *PDK1S0*, *PDK1S1* and *PDK1S2/3* transcripts (from left to right)  
 658 detected using the reverse primers and restriction enzymes indicated above and below the gel image,  
 659 respectively. C, Rescue of the temperature-sensitive growth of the yeast *pkh1 pkh2* mutant strain by  
 660 expression of the *PDK1* or *PDK2* full length cDNA or the *PDK1S0* splice variant cDNA. Three biological  
 661 repeats showed the same result. D and E, The *pPDK1::YFP:PDK1S0* construct rescues the delay in

662 flowering time, short plant height and dwarf rosette leaves of the *pdk1-13 pdk2-4* mutant (D, 14  
663 independent lines were observed), but plants develop shorter siliques carrying less seeds (E). Shown  
664 in (D) are 65-day-old plants. Numbers above siliques in (E) represent average length  $\pm$  SEM (n=10).  
665

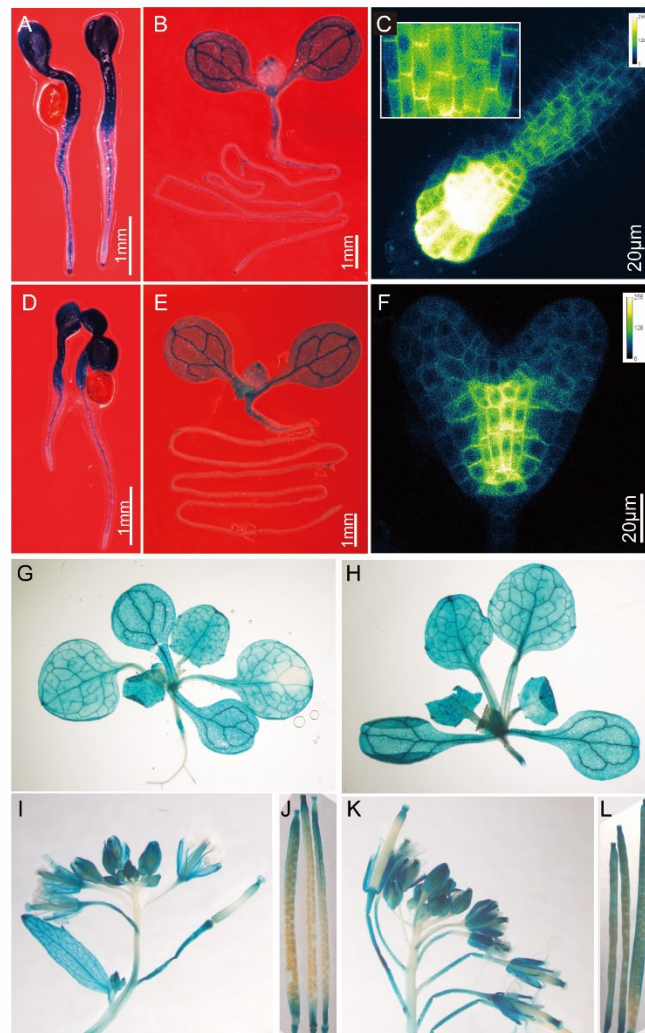

666

667 Figure 5, *PDK1* and *PDK2* are predominantly expressed in (pro) vascular tissues, where *PDK1*  
668 associates with the basal plasma membrane. Spatio-temporal expression pattern of *PDK1* (A, B, G, I,  
669 J) and *PDK2* (D, E, H, K, L) as reported by histochemical staining of 3-day-old seedlings (A, D), 7-  
670 day-old seedlings (B, E), 16-day-old plants (G, H) and inflorescences and siliques from 40-day-old  
671 plants (I-L) of representative *pPDK1-GG* and *pPDK2-GG* lines, respectively. C and F, Confocal images  
672 of a 4-day-old *pPDK1::YFP:PDK1* root tip (C) or a heart stage embryo of the same transgenic line (F).  
673 The inset in (C) shows a detail of YFP:PDK1 localization in root stele cells.

674



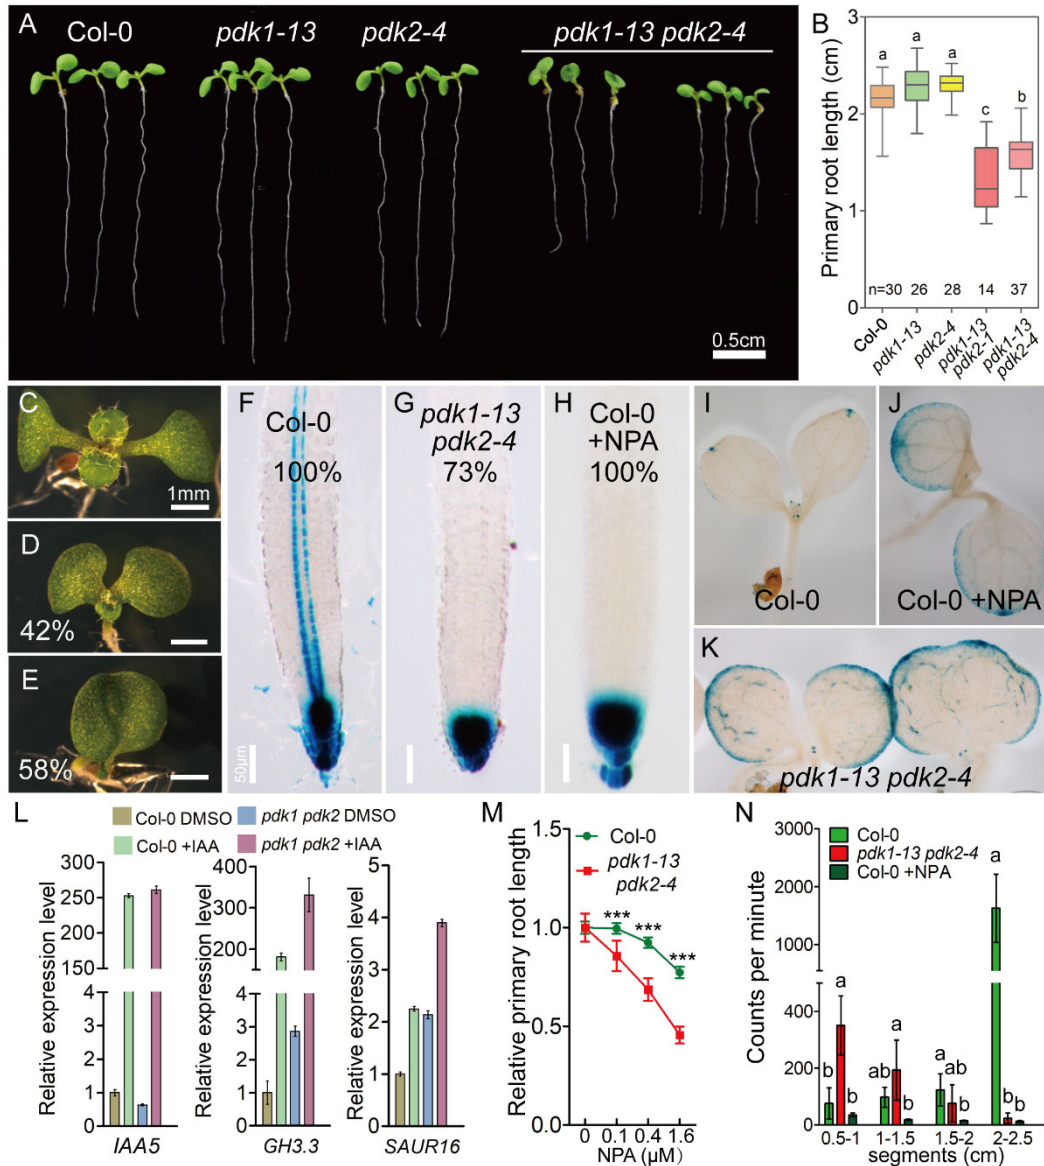

675

676 Figure 6, The phenotype and auxin response pattern of *pdk1pdk2* mutant seedlings resembles that  
 677 of auxin transport inhibitor treated seedlings. A, The phenotype of aligned 7-day-old wild-type (Col-  
 678 0) and *pdk1 pdk2* mutant seedlings. B, Primary root length of 7-day-old seedlings. Lowercase letters  
 679 indicate averages that are significantly different, as tested by a one-way ANOVA followed by Tukey's  
 680 test ( $p < 0.05$ ). C-E, Cotyledon phenotype of wild-type (Col-0) seedlings (C), showing two  
 681 symmetrically distributed cotyledons with extended petioles, or *pdk1-13 pdk2-4* seedlings, of which  
 682 42% position at an angle with short petioles (D,  $n = 460$ ) and 58% show fused cotyledons (E,  $n = 460$ ).  
 683 F-K, Histochemical GUS staining of 7 day old wild-type seedlings (Col-0, F, I), wild-type seedlings  
 684 grown on  $0.5 \mu\text{M}$  NPA (Col-0 + NPA, H, J), or *pdk1-13 pdk2-4* seedlings (G, K), all three containing  
 685 the *pDR5::GUS* auxin response reporter. Percentages in F-H indicate the ratio of representative image

686 out of the observed seedlings (n=15). The rest 27% of *pdk1-13 pdk2-4* show strongly decreased but  
687 not absent *pDR5::GUS* signal in the stele. L, Quantitative RT-PCR analysis of the auxin-induced  
688 expression of *IAA5*, *GH3.3* and *SAUR16* in 5-day-old Arabidopsis wild-type (Col-0) and *pdk1-13*  
689 *pdk2-4* mutant seedlings. The values displayed in the graph are means  $\pm$  SEMs. M, NPA sensitivity  
690 of wild-type (Col-0) and *pdk1-13 pdk2-4* based on the primary root length of seedlings grown on  
691 medium with an increasing NPA concentration (n>22, Student's *t*-test was used for analysis between  
692 groups from the same NPA concentration, p<0.001). Error bar = 95% confidence interval. N,  
693 Transport of <sup>3</sup>H-IAA in 2.5 cm wild-type (Col-0), wild-type with NPA and *pdk1 pdk2* inflorescence  
694 stem pieces. Bars represent the average number of counts per segment  $\pm$  95% confidence interval.  
695 Data were analyzed using a one-way ANOVA followed by Tukey's test. Significant differences are  
696 indicated with different letters in each segment group. A representative experiment of three  
697 biological repeats displaying similar results is shown.  
698

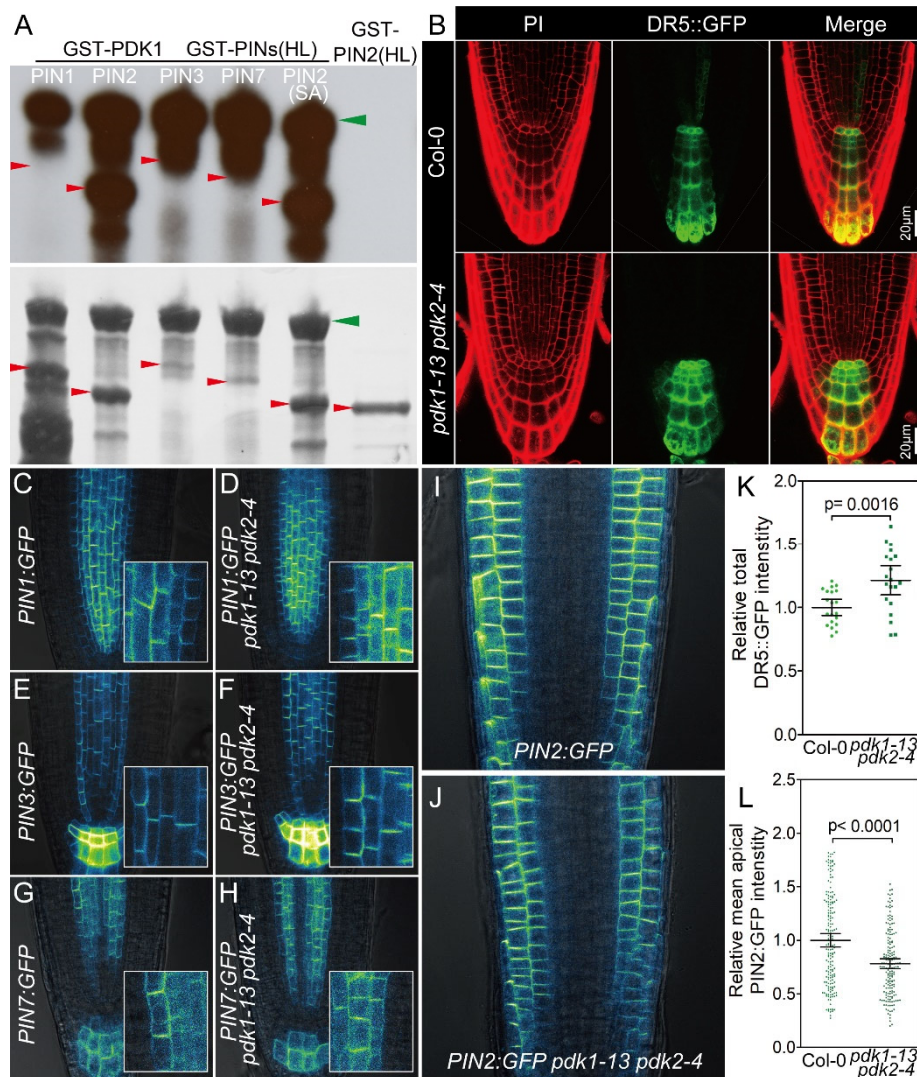

699

700 Figure 7, PDK1 is not involved in PIN polarity control. A, PDK1 phosphorylates the PIN2HL, but not  
 701 the PIN1HL, PIN3HL or PIN7HL, in a S1, S2, S3-independent manner *in vitro*. Red or green arrows  
 702 point out the position of the GST-PINHL or GST-PDK1, respectively. Upper: autoradiograph, lower:  
 703 PageBlue stained gel. B, Confocal images of *DR5::GFP* expression in a wild-type (Col-0, upper panel)  
 704 or a *pdk1-13 pdk2-4* mutant root tip (lower panel). Left: propidium iodide (PI) staining; middle: GFP  
 705 signal; right: merged image. C-J, Confocal images showing the subcellular localization of PIN1:GFP  
 706 (C, D), PIN3:GFP (E, F), PIN7:GFP (G, H), and PIN2:GFP (I, J) in wild-type (Col-0, C, E, G, I) or *pdk1-13*  
 707 *pdk2-4* mutant (D, F, H, J) root tips. Insets in C-H show the details of PIN polarity in stele cells. K and  
 708 L, Relative total GFP intensity produced by *DR5::GFP* expression in columella-QC cells (K, n=20) or  
 709 representing PIN2:GFP at the apical side of the epidermal cells (L, n=8), in wild-type (Col) or *pdk1-13*  
 710 *pdk2-4* mutant roots. DR5::GFP and PIN2:GFP intensities are shown relative to Col-0 control.

711

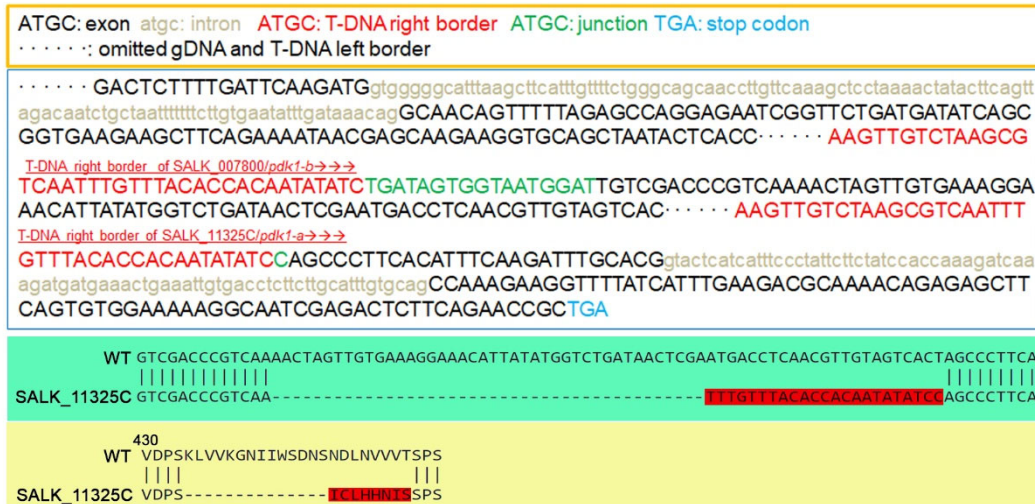

712

713 Figure S1 DNA sequence of T-DNA insertion loci in the Arabidopsis *pdk1-a* (SALK\_11325) and

714 *pdk1-b* (SALK\_007800) T-DNA insertion mutant alleles from NASC. Letters with different colors

715 represent indicated DNA features as indicated in the orange box on the top. Two colored boxes at

716 the bottom show the alignments of part of the PDK1 transcript (green) and the corresponding protein

717 sequence (yellow) in wild-type Arabidopsis (WT) and the *pdk1-a* allele (SALK\_11325C). The

718 differences are highlighted in red.

719

720

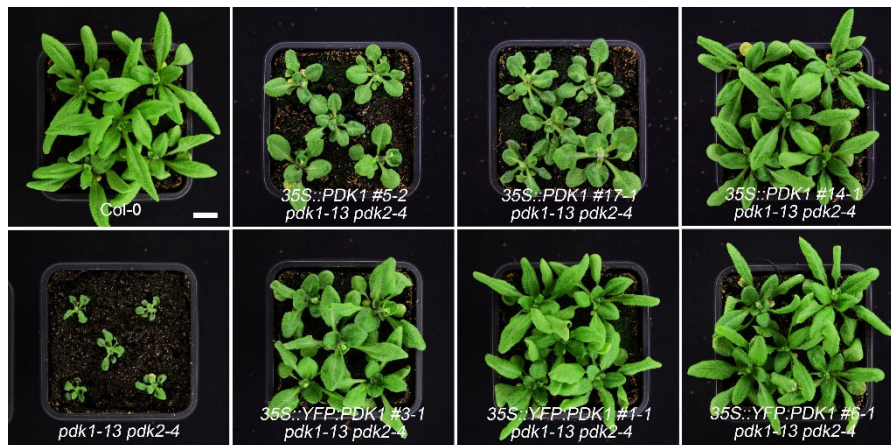

721

722 Figure S2 Complementation of *pdk1-13 pdk2-4* by *35S::PDK1* or *35S::YFP:PDK1*. Plants of wild type

723 (Col-0), *pdk1-13 pdk2-4* and representative complementation lines were grown on plates for 10

724 days then in soil for 20 days before photographing.

725

726

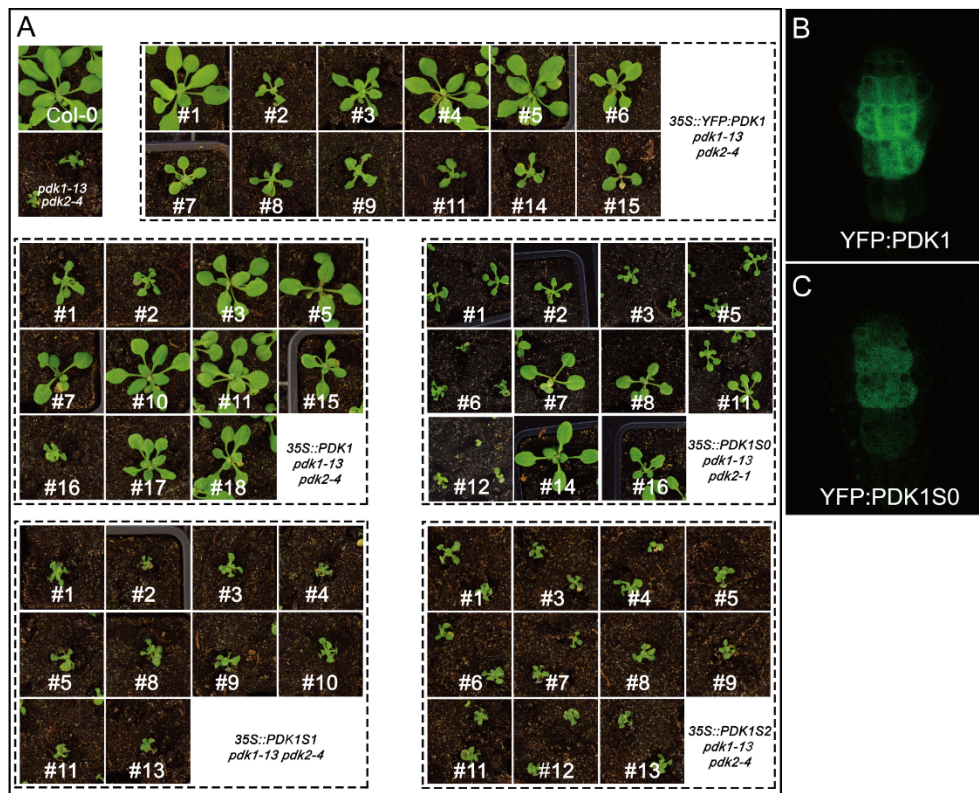

727

728 Figure S3 A, Complementation assay for overexpression of cDNAs representing the different *PDK1*

729 splice variants in the *pdk1 pdk2* mutant background. Plants were grown on plates for 10 days, and

730 subsequently transferred to and grown in soil for 10 days. B and C, Subcellular localization of

731 YFP:PDK1 (B) and YFP:PDK1S0 (C) in root columella cells. YFP:PDK1S0 did not show any plasma

732 membrane localization.

733

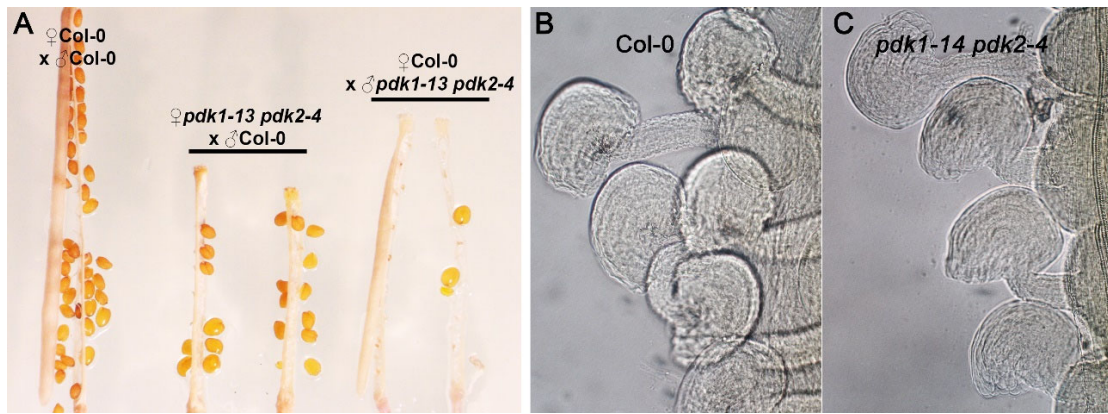

734

735 Figure S4, *pdk1 pdk2* mutants are strongly defective in male gametophyte development and show  
736 normal ovule development. A, Ripe siliques with the valves removed, derived from reciprocal crosses  
737 between wild-type Arabidopsis (Col-0) and the *pdk1-13 pdk2-4* loss-of-function mutant. B, C,  
738 Representative DIC images showing the phenotype of wild-type (B, Col-0, (n>300) and *pdk1-14*  
739 *pdk2-4* mutant (C, n>300) ovules.

740

741

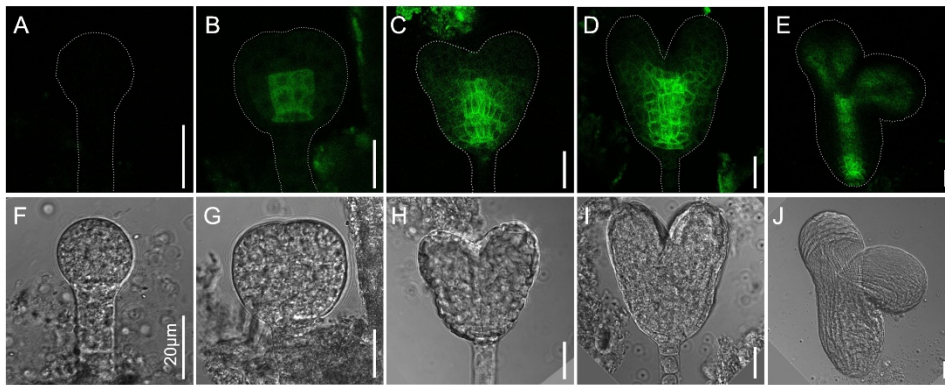

742

743 Figure S5 *PDK1* expression is confined to the provascular tissue during Arabidopsis embryo

744 development. A-E, Confocal (A-E), and bright field images (F-J) of Arabidopsis *pPDK1::YFP::PDK1*

745 16-cell (A, F), globular (B,G), heart (C,H), late heart (D,I), and torpedo (E,J) stage embryos.



746

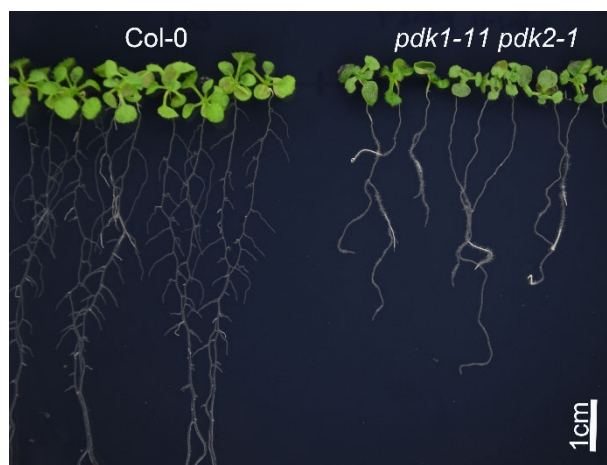

747

748 Figure S6 Phenotype of 15-day-old wild-type (Col-0) and *pdk1-11 pdk2-1* seedlings grown on

749 vertical plates.

750

751

|                | <i>pdk2-1</i> | <i>pdk2-4</i> |
|----------------|---------------|---------------|
| <i>pdk1-11</i> | 1:5.8         | 1:9.6         |
| <i>pdk1-13</i> | 1:7.3         | 1:13.3        |
| <i>pdk1-14</i> | 1:26.6        | 1:12.3        |
| <i>pdk1-31</i> | n.a.          | 1:9.3         |
| <i>pdk1-32</i> | 1:7.5         | 1:5.7         |

752 Table S1 Frequency of *pdk1 pdk2* double homozygous progeny obtained from *pdk1 (-/-) pdk2*

753 (+/-) (green) or *pdk1 (+/-) pdk2 (-/-)* (yellow) parent plants. n>130. n. a.: not analysed.

754

## 755 **References**

- 756 Alessi, D.R., James, S.R., Downes, C.P., Holmes, A.B., Gaffney, P.R.J., Reese, C.B., and Cohen, P.  
757 (1997). Characterization of a 3-phosphoinositide-dependent protein kinase which  
758 phosphorylates and activates protein kinase B $\alpha$ . *Curr. Biol.* **7**: 261–269.
- 759 Anthony, R.G., Henriques, R., Helfer, A., Mészáros, T., Rios, G., Testerink, C., Munnik, T., Deák, M.,  
760 Koncz, C., and Bögre, L. (2004). A protein kinase target of a PDK1 signalling pathway is  
761 involved in root hair growth in Arabidopsis. *EMBO J.* **23**: 572–581.
- 762 Anthony, R.G., Khan, S., Costa, J., Pais, M.S., and Bögre, L. (2006). The Arabidopsis protein kinase  
763 PTI1-2 is activated by convergent phosphatidic acid and oxidative stress signaling pathways  
764 downstream of PDK1 and OX11. *J. Biol. Chem.* **281**: 37536–37546.
- 765 Bahrami-B, F., Ataie-Kachoie, P., Pourgholami, M.H., and Morris, D.L. (2014). P70 Ribosomal  
766 protein S6 kinase (Rps6kb1): An update. *J. Clin. Pathol.* **67**: 1019–1025.
- 767 Bao, F., Shen, J., Brady, S.R., Muday, G.K., Asami, T., and Yang, Z. (2004). Brassinosteroids Interact  
768 with Auxin to Promote Lateral Root Development in Arabidopsis. *Plant Physiol.* **134**: 1624 LP –  
769 1631.
- 770 Barbosa, I.C.R., Hammes, U.Z., and Schwechheimer, C. (2018). Activation and Polarity Control of  
771 PIN-FORMED Auxin Transporters by Phosphorylation. *Trends Plant Sci.* **23**: 523–538.
- 772 Barbosa, I.C.R., Zourelidou, M., Willige, B.C., Weller, B., and Schwechheimer, C. (2014). D6 PROTEIN  
773 KINASE Activates Auxin Transport-Dependent Growth and PIN-FORMED Phosphorylation at  
774 the Plasma Membrane. *Dev. Cell* **29**: 674–685.
- 775 Benjamins, R., Quint, A., Weijers, D., Hooykaas, P., and Offringa, R. (2001). The PINOID protein  
776 kinase regulates organ development in Arabidopsis by enhancing polar auxin transport.  
777 *Development* **128**: 4057–4067.
- 778 Benkova, E., Michniewicz, M., Sauer, M., Teichmann, T., and Pflanz, M. (2003). Local, Efflux-  
779 Dependent Auxin Gradients as a Common Module for Plant Organ Formation. **115**: 591–602.
- 780 Biondi, R.M., Cheung, P.C., Casamayor, A., Deak, M., Currie, R.A., and Alessi, D.R. (2000).  
781 Identification of a pocket in the PDK1 kinase domain that interacts with PIF and the C-  
782 terminal residues of PKA. *EMBO J.* **19**: 979–88.
- 783 Bliou, I., Xu, J., Wildwater, M., Willemsen, V., Friml, J., Heidstra, R., Aida, M., Palme, K., Paponov, I.,

- 784 and Scheres, B. (2005). The PIN auxin efflux facilitator network controls growth and patterning  
785 in Arabidopsis roots. *Nature* **433**: 39–44.
- 786 Camehl, I., Drzewiecki, C., Vadassery, J., Shahollari, B., Sherameti, I., Forzani, C., Munnik, T., Hirt, H.,  
787 and Oelmüller, R. (2011). The OX11 kinase pathway mediates Piriformospora indica-induced  
788 growth promotion in Arabidopsis. *PLoS Pathog.* **7**.
- 789 Casamayor, A., Torrance, P.D., Kobayashi, T., Thorner, J., and Alessi, D.R. (1999). Functional  
790 counterparts of mammalian protein kinases PDK1 and SGK in budding yeast. *Curr. Biol.* **9**:  
791 186–197.
- 792 Chamoto, K., Al-Habsi, M., and Honjo, T. (2010). PDK1: The Major Transducer of PI 3-Kinase  
793 Actions. *Springer Int. Publ.* **410**: 75–97.
- 794 Christensen, S.K., Dagenais, N., Chory, J., and Weigel, D. (2000). Regulation of auxin response by  
795 the protein kinase PINOID. *Cell* **100**: 469–478.
- 796 Clough, S.J. and Bent, A.F. (1998). Floral dip: A simplified method for Agrobacterium-mediated  
797 transformation of *Arabidopsis thaliana*. *Plant J.* **16**: 735–743.
- 798 Currie, R.A., Walker, K.S., Gray, A., Deak, M., Casamayor, A., Downes, C.P., Cohen, P., Alessi, D.R.,  
799 and Lucocq, J. (1999). Role of phosphatidylinositol 3,4,5-trisphosphate in regulating the  
800 activity and localization of 3-phosphoinositide-dependent protein kinase-1. *Biochem. J.* **337**:  
801 575–583.
- 802 Deak, M., Casamayor, A., Currie, R.A., Peter Downes, C., and Alessi, D.R. (1999). Characterisation of  
803 a plant 3-phosphoinositide-dependent protein kinase-1 homologue which contains a  
804 pleckstrin homology domain. *FEBS Lett.* **451**: 220–226.
- 805 Devarenne, T.P., Ekengren, S.K., Pedley, K.F., and Martin, G.B. (2006). Adi3 is a Pdk1-interacting  
806 AGC kinase that negatively regulates plant cell death. *EMBO J.* **25**: 255–265.
- 807 Dhonukshe, P., Huang, F., Galvan-Ampudia, C.S., Mähönen, A.P., Kleine-Vehn, J., Xu, J., Quint, A.,  
808 Prasad, K., Friml, J., Scheres, B., and Offringa, R. (2010). Plasma membrane-bound AGC3  
809 kinases phosphorylate PIN auxin carriers at TPRXS(N/S) motifs to direct apical PIN recycling.  
810 *Development* **137**: 3245–55.
- 811 Dittrich, A.C.N. and Devarenne, T.P. (2012a). Characterization of a PDK1 Homologue from the Moss  
812 *Physcomitrella patens*. *Plant Physiol.* **158**: 1018–1033.
- 813 Dittrich, A.C.N. and Devarenne, T.P. (2012b). Perspectives in PDK1 evolution: Insights from

814 photosynthetic and non-photosynthetic organisms. *Plant Signal. Behav.* **7**: 642–649.

815 Enugutti, B., Kirchhelle, C., Oelschner, M., Torres Ruiz, R.A., Schliebner, I., Leister, D., and Schneitz,  
816 K. (2012). Regulation of planar growth by the Arabidopsis AGC protein kinase UNICORN.  
817 *Proc. Natl. Acad. Sci.* **109**: 15060–15065.

818 Fauser, F., Schiml, S., and Puchta, H. (2014). Both CRISPR/Cas-based nucleases and nickases can be  
819 used efficiently for genome engineering in Arabidopsis thaliana. *Plant J.* **79**: 348–359.

820 Friml, J. et al. (2004). A PINOID-dependent binary switch in apical-basal PIN polar targeting directs  
821 auxin efflux. *Science* (80-. ). **306**: 862–865.

822 Frödin, M., Antal, T.L., Dümmler, B.A., Jensen, C.J., Deak, M., Gammeltoft, S., and Biondi, R.M.  
823 (2002). A phosphoserine/threonine-binding pocket in AGC kinases and PDK1 mediates  
824 activation by hydrophobic motif phosphorylation. *EMBO J.* **21**: 5396–5407.

825 Galván-Ampudia, C.S. and Offringa, R. (2007). Plant evolution: AGC kinases tell the auxin tale.  
826 *Trends Plant Sci.* **12**: 541–547.

827 Gälweiler, L., Guan, C., Müller, A., Wisman, E., Mendgen, K., Yephremov, A., and Palme, K. (1998).  
828 Regulation of polar auxin transport by AtPIN1 in Arabidopsis vascular tissue. *Science* **282**:  
829 2226–30.

830 Gray, J.W., Nelson Dittrich, A.C., Chen, S., Avila, J., Giavalisco, P., and Devarenne, T.P. (2013). Two  
831 Pdk1 phosphorylation sites on the plant cell death suppressor Adi3 contribute to substrate  
832 phosphorylation. *Biochim. Biophys. Acta - Proteins Proteomics* **1834**: 1099–1106.

833 Haga, K., Frank, L., Kimura, T., Schwechheimer, C., and Sakai, T. (2018). Roles of AGCVIII Kinases in  
834 the Hypocotyl Phototropism of Arabidopsis Seedlings. *Plant Cell Physiol.* **59**: 1060–1071.

835 Heilmann, I. (2016). Phosphoinositide signaling in plant development. *Development* **143**: 2044–  
836 2055.

837 Hensel, L.L., Nelson, M.A., Richmond, T.A., and Bleecker, A.B. (1994). The fate of inflorescence  
838 meristems is controlled by developing fruits in Arabidopsis. *Plant Physiol.* **106**: 863–76.

839 Huang, F., Kemel Zago, M., Abas, L., van Marion, A., Galván-Ampudia, C.S., and Offringa, R. (2010).  
840 Phosphorylation of Conserved PIN Motifs Directs *Arabidopsis* PIN1 Polarity and Auxin  
841 Transport. *Plant Cell* **22**: 1129–1142.

842 Huang, J., Smith, A.R., Zhang, T., and Zhao, D. (2016). Creating Completely Both Male and Female  
843 Sterile Plants by Specifically Ablating Microspore and Megaspore Mother Cells. *Front. Plant*

- 844 Sci. 7: 1–12.
- 845 Kleine-Vehn, J., Huang, F., Naramoto, S., Zhang, J., Michniewicz, M., Offringa, R., and Friml, J.  
846 (2009). PIN Auxin Efflux Carrier Polarity Is Regulated by PINOID Kinase-Mediated Recruitment  
847 into GNOM-Independent Trafficking in Arabidopsis. *Plant Cell* **21**: 3839–3849.
- 848 Lawlor, M.A. and Alessi, D.R. (2001). PKB/Akt: a key mediator of cell proliferation, survival and  
849 insulin responses? *J. Cell Sci.* **114**: 2903–10.
- 850 Lawlor, M.A., Mora, A., Ashby, P.R., Williams, M.R., Murray-Tait, V., Malone, L., Prescott, A.R.,  
851 Lucocq, J.M., and Alessi, D.R. (2002). Essential role of PDK1 in regulating cell size and  
852 development in mice. *EMBO J.* **21**: 3728–3738.
- 853 Li, E., Cui, Y., Ge, F.R., Chai, S., Zhang, W.T., Feng, Q.N., Jiang, L., Li, S., and Zhang, Y. (2018).  
854 AGC1.5 Kinase Phosphorylates RopGEFs to Control Pollen Tube Growth. *Mol. Plant* **11**: 1198–  
855 1209.
- 856 Marhava, P., Bassukas, A.E.L., Zourelidou, M., Kolb, M., Moret, B., Fastner, A., Schulze, W.X.,  
857 Cattaneo, P., Hammes, U.Z., Schwechheimer, C., and Hardtke, C.S. (2018). A molecular  
858 rheostat adjusts auxin flux to promote root protophloem differentiation. *Nature* **558**: 297–300.
- 859 Matsui, H., Miyao, A., Takahashi, A., and Hirochika, H. (2010). Pdk1 kinase regulates basal disease  
860 resistance through the OsOxi1–OsPti1a phosphorylation cascade in rice. *Plant Cell Physiol.* **51**:  
861 2082–2091.
- 862 Mora, A., Komander, D., Van Aalten, D.M.F., and Alessi, D.R. (2004). PDK1, the master regulator of  
863 AGC kinase signal transduction. *Semin. Cell Dev. Biol.* **15**: 161–170.
- 864 Niederberger, C. and Schweingruber, M.E. (1999). A *Schizosaccharomyces pombe* gene, *ksg1*, that  
865 shows structural homology to the human phosphoinositide-dependent protein kinase PDK1,  
866 is essential for growth, mating and sporulation. *Mol. Gen. Genet.* **261**: 177–183.
- 867 Ottenschlager, I., Wolff, P., Wolverton, C., Bhalerao, R.P., Sandberg, G., Ishikawa, H., Evans, M., and  
868 Palme, K. (2003). Gravity-regulated differential auxin transport from columella to lateral root  
869 cap cells. *Proc. Natl. Acad. Sci.* **100**: 2987–2991.
- 870 Pearce, L.R., Komander, D., and Alessi, D.R. (2010). The nuts and bolts of AGC protein kinases. *Nat.*  
871 *Rev. Mol. Cell Biol.* **11**: 9–22.
- 872 Petersen, L.N., Ingle, R.A., Knight, M.R., and Denby, K.J. (2009). OX11 protein kinase is required for  
873 plant immunity against *Pseudomonas syringae* in arabidopsis. *J. Exp. Bot.* **60**: 3727–3735.

- 874 Rademacher, E.H. and Offringa, R. (2012). Evolutionary Adaptations of Plant AGC Kinases: From  
875 Light Signaling to Cell Polarity Regulation. *Front. Plant Sci.* **3**: 1–16.
- 876 Rentel, M.C., Lecourieux, D., Ouaked, F., Usher, S.L., Peterson, L., Okamoto, H., Knight, H., Peck,  
877 S.C., Grierson, C.S., Hirt, H., and Knight, M.R. (2004). OXI1 kinase is necessary for oxidative  
878 burst-mediated signalling. *Nature* **427**: 858–861.
- 879 Rintelen, F., Stocker, H., Thomas, G., and Hafen, E. (2002). PDK1 regulates growth through Akt and  
880 S6K in *Drosophila*. *Proc. Natl. Acad. Sci.* **98**: 15020–15025.
- 881 Sabatini, S., Beis, D., Wolkenfelt, H., Murfett, J., Guilfoyle, T., Malamy, J., Benfey, P., Leyser, O.,  
882 Bechtold, N., Weisbeek, P., and Scheres, B. (1999). An auxin-dependent distal organizer of  
883 pattern and polarity in the *Arabidopsis* root. *Cell* **99**: 463–472.
- 884 Schirawski, J., Planchais, S., and Haenni, A.L. (2000). An improved protocol for the preparation of  
885 protoplasts from an established *Arabidopsis thaliana* cell suspension culture and infection  
886 with RNA of turnip yellow mosaic tymovirus: A simple and reliable method. *J. Virol. Methods*  
887 **86**: 85–94.
- 888 Scholz, S., Pleßmann, J., Enugutti, B., Hüttl, R., Wassmer, K., and Schneitz, K. (2019). The AGC  
889 protein kinase UNICORN controls planar growth by attenuating PDK1 in *Arabidopsis thaliana*.  
890 *PLoS Genet.* **15**: e1007927.
- 891 Simon, M.L.A., Platre, M.P., Marquès-Bueno, M.M., Armengot, L., Stanislas, T., Bayle, V., Caillaud,  
892 M.C., and Jaillais, Y. (2016). A PtdIns(4)P-driven electrostatic field controls cell membrane  
893 identity and signalling in plants. *Nat. Plants* **2**: 1–10.
- 894 Voordeckers, K., Kimpe, M., Haesendonckx, S., Louwet, W., Versele, M., and Thevelein, J.M. (2011).  
895 Yeast 3-phosphoinositide-dependent protein kinase-1 (PDK1) orthologs Pkh1-3 differentially  
896 regulate phosphorylation of protein kinase A (PKA) and the protein kinase B (PKB)/S6K  
897 ortholog Sch9. *J. Biol. Chem.* **286**: 22017–22027.
- 898 Willige, B.C., Ahlers, S., Zourelidou, M., Barbosa, I.C.R., Demarsy, E., Trevisan, M., Davis, P.A.,  
899 Roelfsema, M.R.G., Hangarter, R., Fankhauser, C., and Schwechheimer, C. (2013). D6PK  
900 AGCVIII Kinases Are Required for Auxin Transport and Phototropic Hypocotyl Bending in  
901 *Arabidopsis*. *Plant Cell* **25**: 1674–1688.
- 902 Won, S.-K., Lee, Y.-J., Lee, H.-Y., Heo, Y.-K., Cho, M., and Cho, H.-T. (2009). cis-Element- and  
903 Transcriptome-Based Screening of Root Hair-Specific Genes and Their Functional

- 904 Characterization in Arabidopsis. *Plant Physiol.* **150**: 1459–1473.
- 905 **Xu, J. and Scheres, B.** (2005). Dissection of Arabidopsis ADP-RIBOSYLATION FACTOR 1 function in  
906 epidermal cell polarity. *Plant Cell* **17**: 525–36.
- 907 **Yan, L., Wei, S., Wu, Y., Hu, R., Li, H., Yang, W., and Xie, Q.** (2015). High-Efficiency Genome Editing  
908 in Arabidopsis Using YAO Promoter-Driven CRISPR/Cas9 System. *Mol. Plant* **8**: 1820–1823.
- 909 **Zádníková, P. et al.** (2010). Role of PIN-mediated auxin efflux in apical hook development of  
910 Arabidopsis thaliana. *Development* **137**: 607–17.
- 911 **Zegzouti, H., Anthony, R.G., Jahchan, N., Bogre, L., and Christensen, S.K.** (2006a). Phosphorylation  
912 and activation of PINOID by the phospholipid signaling kinase 3-phosphoinositide-  
913 dependent protein kinase 1 (PDK1) in Arabidopsis. *Proc. Natl. Acad. Sci.* **103**: 6404–6409.
- 914 **Zegzouti, H., Li, W., Lorenz, T.C., Xie, M., Payne, C.T., Smith, K., Glenny, S., Payne, G.S., and**  
915 **Christensen, S.K.** (2006b). Structural and functional insights into the regulation of Arabidopsis  
916 AGC VIIIa kinases. *J. Biol. Chem.* **281**: 35520–35530.
- 917 **Zhang, Y., He, J., and McCormick, S.** (2009). Two Arabidopsis AGC kinases are critical for the  
918 polarized growth of pollen tubes. *Plant J.* **58**: 474–484.
- 919 **Ziemba, B.P., Pilling, C., Calleja, V., Larijani, B., and Falke, J.J.** (2013). The PH Domain of PDK1  
920 Exhibits a Novel, Phospho-Regulated Monomer-Dimer Equilibrium With Important  
921 Implications for Kinase Domain Activation: Single Molecule and Ensemble Studies.  
922 *Biochemistry* **100**: 130–134.
- 923 **Zourelidou, M., Muller, I., Willige, B.C., Nill, C., Jikumaru, Y., Li, H., and Schwechheimer, C.** (2009).  
924 The polarly localized D6 PROTEIN KINASE is required for efficient auxin transport in  
925 Arabidopsis thaliana. *Development* **136**: 627–636.
- 926
